# Supplementary material
Source: PubMed Central journal article supplement (PMC2668213)
Supplement: NIHMS86624-supplement-1_si_001.pdf [file NIHMS86624-supplement-1_si_001.pdf]

## Supporting Information

### Synthesis, Radiosynthesis, and Biological Evaluation of Fluorine-18 Labeled 2 $\beta$ -Carbo(fluoroalkoxy)-3 $\beta$ -(3'-(Z)-2-haloethenyl)phenyl)nortropans: Candidate Radioligands for *In Vivo* Imaging of the Serotonin Transporter with Positron Emission Tomography

Jeffrey S. Stehouwer,<sup>†</sup> Nachwa Jarkas,<sup>†</sup> Fanxing Zeng,<sup>†</sup> Ronald J. Voll,<sup>†</sup> Larry Williams,<sup>†</sup> Vernon M. Camp,<sup>†</sup> Eugene J. Malveaux,<sup>†</sup> John R. Votaw,<sup>†</sup> Leonard Howell,<sup>‡</sup> Michael J. Owens,<sup>§</sup> and Mark M. Goodman<sup>\*†§</sup>

Department of Radiology, Department of Psychiatry and Behavioral Sciences, and Yerkes National Primate Research Center, Emory University, Atlanta, GA

#### Table of Contents

|                                                                                                              |         |
|--------------------------------------------------------------------------------------------------------------|---------|
| MicroPET and HRRT uptake data and uptake ratios for [ <sup>18</sup> F] <b>1</b> -[ <sup>18</sup> F] <b>4</b> | S2-S18  |
| MicroPET and HRRT TACs and uptake data and ratios for [ <sup>18</sup> F] <b>19</b>                           | S19-S25 |
| Percentage of protein-bound [ <sup>18</sup> F] <b>1</b> (Table S15)                                          | S25     |
| Analytical data for <b>1-4</b> (Table S16)                                                                   | S25     |

**Table S1.** Standard uptake values (SUV) vs. time used to generate the TACs in Figure 1 for the baseline study with [<sup>18</sup>F]1.

| Time (min) | Caudate | Putamen | Thalamus | Midbrain | Pons | Medulla | Cerebellum | Occipital | Frontal |
|------------|---------|---------|----------|----------|------|---------|------------|-----------|---------|
| 0.5        | 0.00    | 0.00    | 0.00     | 0.00     | 0.00 | 0.00    | 0.00       | 0.00      | 0.00    |
| 1.5        | 0.08    | 0.10    | 0.09     | 0.11     | 0.09 | 0.13    | 0.11       | 0.07      | 0.06    |
| 2.5        | 0.37    | 0.44    | 0.43     | 0.54     | 0.44 | 0.52    | 0.46       | 0.35      | 0.28    |
| 3.5        | 0.79    | 0.96    | 0.96     | 1.19     | 0.77 | 1.08    | 1.14       | 0.73      | 0.64    |
| 4.5        | 1.23    | 1.53    | 1.57     | 1.87     | 1.20 | 1.80    | 1.91       | 1.22      | 1.07    |
| 6.5        | 2.02    | 2.54    | 2.49     | 2.99     | 2.02 | 2.75    | 2.98       | 2.00      | 1.76    |
| 9.5        | 2.50    | 3.07    | 3.01     | 3.52     | 2.40 | 3.15    | 3.50       | 2.38      | 2.07    |
| 12.5       | 2.74    | 3.33    | 3.32     | 3.95     | 2.58 | 3.37    | 3.71       | 2.65      | 2.24    |
| 15.5       | 2.94    | 3.61    | 3.48     | 4.07     | 2.82 | 3.53    | 3.86       | 2.80      | 2.47    |
| 18.5       | 3.07    | 3.78    | 3.70     | 4.37     | 2.91 | 3.61    | 3.97       | 2.84      | 2.68    |
| 22.5       | 3.32    | 3.96    | 3.88     | 4.56     | 3.05 | 3.83    | 4.02       | 3.00      | 2.73    |
| 27.5       | 3.39    | 4.16    | 4.02     | 4.71     | 3.21 | 3.97    | 4.10       | 3.08      | 2.82    |
| 35         | 3.54    | 4.28    | 4.20     | 4.85     | 3.29 | 4.05    | 4.00       | 3.15      | 2.89    |
| 45         | 3.67    | 4.41    | 4.30     | 4.90     | 3.34 | 4.00    | 3.73       | 3.10      | 2.95    |
| 55         | 3.72    | 4.37    | 4.29     | 4.91     | 3.27 | 3.96    | 3.50       | 3.01      | 2.89    |
| 65         | 3.67    | 4.36    | 4.26     | 4.91     | 3.20 | 3.97    | 3.23       | 2.86      | 2.78    |
| 75         | 3.62    | 4.28    | 4.16     | 4.76     | 3.21 | 3.78    | 3.01       | 2.72      | 2.76    |
| 85         | 3.53    | 4.16    | 4.04     | 4.67     | 3.13 | 3.75    | 2.82       | 2.55      | 2.64    |
| 95         | 3.39    | 4.02    | 3.91     | 4.55     | 3.05 | 3.56    | 2.61       | 2.38      | 2.53    |
| 105        | 3.33    | 3.88    | 3.74     | 4.34     | 3.01 | 3.58    | 2.35       | 2.25      | 2.40    |
| 115        | 3.17    | 3.74    | 3.58     | 4.18     | 2.86 | 3.43    | 2.23       | 2.09      | 2.24    |
| 125        | 3.00    | 3.58    | 3.41     | 4.08     | 2.76 | 3.27    | 2.08       | 1.97      | 2.17    |
| 135        | 2.87    | 3.44    | 3.33     | 3.97     | 2.65 | 3.24    | 1.96       | 1.82      | 2.08    |
| 145        | 2.75    | 3.27    | 3.16     | 3.85     | 2.57 | 3.04    | 1.85       | 1.73      | 1.97    |
| 155        | 2.62    | 3.13    | 3.03     | 3.66     | 2.50 | 2.98    | 1.74       | 1.63      | 1.86    |
| 165        | 2.56    | 3.02    | 2.91     | 3.53     | 2.46 | 2.88    | 1.65       | 1.60      | 1.81    |
| 175        | 2.43    | 2.93    | 2.76     | 3.46     | 2.36 | 2.78    | 1.57       | 1.50      | 1.72    |
| 182.5      | 2.31    | 2.78    | 2.74     | 3.40     | 2.17 | 2.68    | 1.52       | 1.45      | 1.70    |
| 187.5      | 2.26    | 2.77    | 2.65     | 3.37     | 2.31 | 2.64    | 1.50       | 1.38      | 1.65    |
| 192.5      | 2.28    | 2.67    | 2.56     | 3.24     | 2.14 | 2.52    | 1.49       | 1.37      | 1.58    |
| 197.5      | 2.24    | 2.63    | 2.46     | 3.20     | 2.25 | 2.51    | 1.41       | 1.39      | 1.58    |
| 202.5      | 2.21    | 2.63    | 2.52     | 3.15     | 2.25 | 2.54    | 1.43       | 1.33      | 1.48    |
| 207.5      | 2.16    | 2.58    | 2.43     | 3.17     | 2.19 | 2.50    | 1.40       | 1.32      | 1.55    |
| 215        | 2.09    | 2.53    | 2.38     | 3.12     | 2.08 | 2.43    | 1.40       | 1.28      | 1.51    |
| 225        | 2.02    | 2.44    | 2.29     | 2.99     | 2.03 | 2.37    | 1.26       | 1.22      | 1.45    |
| 235        | 1.99    | 2.35    | 2.20     | 2.94     | 1.97 | 2.32    | 1.31       | 1.18      | 1.39    |

**Table S2.** Uptake values (Relative HRRT counts/pixel) vs. time used to generate the TACs in Figure 3 for the awake rhesus monkey baseline study with [<sup>18</sup>F]1.

| Time (min) | Putamen | Caudate | Thalamus | Cerebellum | Frontal | Medulla | Pons | Midbrain |
|------------|---------|---------|----------|------------|---------|---------|------|----------|
| 0.25       | 0.00    | 0.00    | 0.01     | 0.01       | 0.00    | 0.00    | 0.00 | 0.00     |
| 0.75       | 0.00    | 0.00    | 0.00     | 0.00       | 0.00    | 0.00    | 0.00 | 0.00     |
| 1.25       | 0.01    | 0.01    | 0.01     | 0.01       | 0.00    | 0.01    | 0.01 | 0.01     |
| 1.75       | 0.02    | 0.02    | 0.02     | 0.01       | 0.02    | 0.01    | 0.02 | 0.02     |
| 2.25       | 0.03    | 0.03    | 0.04     | 0.02       | 0.02    | 0.02    | 0.03 | 0.03     |
| 2.75       | 0.04    | 0.03    | 0.04     | 0.04       | 0.03    | 0.03    | 0.02 | 0.04     |
| 4.5        | 0.07    | 0.06    | 0.07     | 0.05       | 0.05    | 0.06    | 0.05 | 0.06     |
| 7.5        | 0.11    | 0.09    | 0.11     | 0.08       | 0.07    | 0.07    | 0.08 | 0.08     |
| 10.5       | 0.11    | 0.10    | 0.12     | 0.08       | 0.08    | 0.09    | 0.08 | 0.09     |
| 13.5       | 0.11    | 0.09    | 0.11     | 0.08       | 0.08    | 0.08    | 0.08 | 0.09     |
| 17.5       | 0.14    | 0.12    | 0.13     | 0.10       | 0.10    | 0.10    | 0.09 | 0.11     |
| 25         | 0.16    | 0.13    | 0.14     | 0.11       | 0.11    | 0.11    | 0.12 | 0.13     |
| 35         | 0.16    | 0.14    | 0.16     | 0.11       | 0.11    | 0.12    | 0.13 | 0.14     |
| 45         | 0.17    | 0.15    | 0.18     | 0.12       | 0.12    | 0.12    | 0.13 | 0.15     |
| 55         | 0.17    | 0.15    | 0.17     | 0.11       | 0.11    | 0.12    | 0.13 | 0.16     |
| 65         | 0.16    | 0.14    | 0.17     | 0.11       | 0.11    | 0.12    | 0.14 | 0.16     |
| 75         | 0.17    | 0.15    | 0.16     | 0.10       | 0.11    | 0.11    | 0.14 | 0.15     |
| 85         | 0.16    | 0.14    | 0.17     | 0.10       | 0.11    | 0.11    | 0.15 | 0.16     |
| 95         | 0.16    | 0.14    | 0.16     | 0.09       | 0.10    | 0.11    | 0.15 | 0.15     |
| 105        | 0.14    | 0.13    | 0.15     | 0.09       | 0.10    | 0.10    | 0.14 | 0.15     |
| 115        | 0.13    | 0.13    | 0.14     | 0.08       | 0.10    | 0.11    | 0.15 | 0.15     |

**Table S3.** Standard uptake values (SUV) vs. time used to generate the TACs in Figure 6 for the baseline study with [ $^{18}\text{F}$ ]2.

| Time (min) | Caudate | Putamen | Thalamus | Midbrain | Pons | Medulla | Cerebellum | Frontal | Occipital |
|------------|---------|---------|----------|----------|------|---------|------------|---------|-----------|
| 0.5        | 0.00    | 0.01    | 0.00     | 0.01     | 0.01 | 0.00    | 0.00       | 0.00    | 0.01      |
| 1.5        | 0.04    | 0.06    | 0.08     | 0.08     | 0.09 | 0.08    | 0.06       | 0.04    | 0.06      |
| 2.5        | 0.36    | 0.40    | 0.29     | 0.55     | 0.42 | 0.61    | 0.42       | 0.22    | 0.36      |
| 3.5        | 0.63    | 1.00    | 0.67     | 0.95     | 0.82 | 1.26    | 1.14       | 0.62    | 0.64      |
| 4.5        | 1.12    | 1.72    | 1.44     | 1.76     | 1.78 | 2.07    | 1.76       | 1.02    | 1.32      |
| 6.5        | 1.92    | 3.01    | 2.44     | 2.99     | 2.79 | 3.64    | 2.75       | 1.75    | 2.17      |
| 9.5        | 2.36    | 3.59    | 2.83     | 3.41     | 3.15 | 3.76    | 3.17       | 2.06    | 2.66      |
| 12.5       | 2.61    | 3.69    | 3.00     | 3.83     | 3.52 | 4.20    | 3.41       | 2.27    | 2.68      |
| 15.5       | 2.89    | 4.05    | 3.29     | 4.06     | 3.73 | 4.15    | 3.57       | 2.38    | 2.99      |
| 18.5       | 2.80    | 4.37    | 3.32     | 4.16     | 4.13 | 4.39    | 3.59       | 2.39    | 2.89      |
| 22.5       | 3.22    | 4.33    | 3.43     | 4.28     | 3.81 | 4.70    | 3.81       | 2.54    | 3.14      |
| 27.5       | 3.30    | 4.67    | 3.94     | 4.53     | 4.10 | 4.57    | 3.80       | 2.69    | 3.28      |
| 35         | 3.56    | 4.80    | 3.89     | 4.68     | 4.22 | 4.97    | 3.84       | 2.78    | 3.43      |
| 45         | 3.83    | 4.94    | 4.15     | 4.82     | 4.45 | 4.87    | 3.76       | 2.85    | 3.55      |
| 55         | 4.10    | 5.05    | 4.38     | 4.98     | 4.36 | 4.82    | 3.61       | 2.80    | 3.49      |
| 65         | 4.08    | 5.10    | 4.51     | 5.00     | 4.56 | 4.81    | 3.50       | 2.94    | 3.45      |
| 75         | 3.94    | 5.00    | 4.29     | 4.96     | 4.51 | 4.73    | 3.30       | 2.86    | 3.49      |
| 85         | 4.06    | 4.94    | 4.41     | 4.90     | 4.29 | 4.73    | 3.17       | 2.88    | 3.31      |
| 95         | 4.15    | 4.83    | 4.31     | 4.91     | 4.36 | 4.55    | 3.05       | 2.75    | 3.16      |
| 105        | 4.01    | 4.82    | 4.23     | 4.87     | 4.34 | 4.31    | 2.87       | 2.69    | 3.15      |
| 115        | 4.06    | 4.68    | 4.22     | 4.78     | 4.51 | 4.28    | 2.78       | 2.69    | 3.02      |
| 125        | 3.75    | 4.59    | 4.15     | 4.73     | 4.27 | 4.14    | 2.68       | 2.69    | 3.07      |
| 135        | 3.74    | 4.40    | 4.03     | 4.67     | 4.26 | 4.21    | 2.43       | 2.56    | 2.78      |
| 145        | 3.52    | 4.21    | 3.86     | 4.65     | 4.16 | 3.92    | 2.35       | 2.52    | 2.74      |
| 155        | 3.47    | 4.01    | 3.64     | 4.54     | 3.92 | 3.83    | 2.19       | 2.46    | 2.67      |
| 165        | 3.44    | 3.92    | 3.64     | 4.28     | 3.90 | 3.94    | 2.18       | 2.38    | 2.50      |
| 175        | 3.29    | 3.76    | 3.36     | 4.13     | 3.72 | 3.62    | 2.03       | 2.19    | 2.42      |
| 185        | 3.28    | 3.68    | 3.48     | 4.14     | 3.60 | 3.61    | 1.86       | 2.29    | 2.37      |
| 195        | 3.08    | 3.53    | 3.18     | 3.91     | 3.63 | 3.34    | 1.79       | 2.18    | 2.02      |
| 205        | 2.92    | 3.42    | 3.30     | 4.00     | 3.51 | 3.14    | 1.80       | 1.98    | 2.28      |
| 215        | 2.85    | 3.24    | 2.92     | 3.76     | 3.22 | 3.04    | 1.78       | 1.97    | 2.01      |
| 225        | 2.93    | 3.00    | 2.95     | 3.74     | 2.77 | 2.67    | 1.64       | 1.88    | 1.95      |
| 235        | 2.53    | 2.98    | 2.88     | 3.76     | 3.08 | 2.72    | 1.62       | 1.87    | 1.94      |

**Table S4.** Standard uptake values (SUV) vs. time used to generate the TACs in Figure 7 for the baseline study with [<sup>18</sup>F]3.

| Time (min) | Caudate | Putamen | Thalamus | Midbrain | Pons | Medulla | Occipital | Cerebellum | Frontal |
|------------|---------|---------|----------|----------|------|---------|-----------|------------|---------|
| 0.5        | 0.01    | 0.01    | 0.01     | 0.01     | 0.01 | 0.01    | 0.01      | 0.01       | 0.00    |
| 1.5        | 0.16    | 0.27    | 0.24     | 0.32     | 0.21 | 0.35    | 0.19      | 0.27       | 0.16    |
| 2.5        | 0.64    | 0.84    | 0.80     | 0.98     | 0.95 | 0.84    | 0.62      | 1.12       | 0.50    |
| 3.5        | 1.15    | 1.59    | 1.44     | 1.74     | 1.71 | 2.20    | 1.29      | 1.95       | 0.83    |
| 4.5        | 1.55    | 2.31    | 2.07     | 2.42     | 1.92 | 2.58    | 2.06      | 2.50       | 1.31    |
| 6.5        | 2.53    | 3.28    | 3.06     | 3.41     | 2.85 | 3.75    | 2.83      | 3.91       | 1.88    |
| 9.5        | 2.70    | 3.75    | 3.45     | 4.00     | 3.47 | 3.97    | 3.14      | 4.24       | 2.11    |
| 12.5       | 3.00    | 4.08    | 3.75     | 4.11     | 3.49 | 4.73    | 3.60      | 4.52       | 2.24    |
| 15.5       | 3.34    | 4.27    | 4.11     | 4.45     | 3.62 | 4.36    | 3.53      | 4.75       | 2.42    |
| 18.5       | 3.38    | 4.42    | 4.22     | 4.65     | 4.20 | 4.60    | 3.85      | 4.74       | 2.50    |
| 22.5       | 3.53    | 4.71    | 4.46     | 4.55     | 4.10 | 4.94    | 3.88      | 4.78       | 2.64    |
| 27.5       | 3.68    | 4.90    | 4.66     | 5.04     | 4.39 | 5.08    | 4.00      | 4.80       | 2.72    |
| 35         | 3.90    | 4.99    | 4.81     | 5.01     | 4.25 | 5.04    | 4.01      | 4.74       | 2.85    |
| 45         | 4.05    | 5.05    | 4.84     | 5.02     | 4.50 | 5.13    | 4.09      | 4.48       | 2.84    |
| 55         | 4.09    | 5.03    | 4.89     | 4.98     | 4.40 | 5.06    | 4.00      | 4.31       | 2.82    |
| 65         | 3.99    | 4.95    | 4.79     | 4.97     | 4.54 | 4.96    | 3.86      | 4.08       | 2.77    |
| 75         | 4.05    | 4.92    | 4.76     | 5.00     | 4.34 | 5.16    | 3.68      | 3.87       | 2.76    |
| 85         | 3.94    | 4.82    | 4.59     | 4.92     | 4.12 | 4.79    | 3.52      | 3.60       | 2.71    |
| 95         | 3.82    | 4.67    | 4.52     | 4.77     | 4.41 | 4.93    | 3.35      | 3.46       | 2.68    |
| 105        | 3.70    | 4.52    | 4.44     | 4.82     | 4.01 | 4.34    | 3.18      | 3.31       | 2.58    |
| 115        | 3.61    | 4.44    | 4.24     | 4.76     | 3.98 | 4.59    | 3.09      | 3.10       | 2.56    |
| 125        | 3.51    | 4.31    | 4.15     | 4.58     | 3.82 | 4.54    | 2.96      | 2.79       | 2.54    |
| 135        | 3.34    | 4.16    | 4.02     | 4.45     | 4.08 | 4.50    | 2.82      | 2.66       | 2.35    |
| 145        | 3.24    | 3.91    | 3.93     | 4.38     | 3.74 | 4.24    | 2.82      | 2.40       | 2.29    |
| 155        | 3.19    | 3.80    | 3.73     | 4.35     | 3.52 | 4.09    | 2.63      | 2.32       | 2.33    |
| 165        | 3.04    | 3.74    | 3.67     | 4.26     | 3.73 | 4.45    | 2.59      | 2.37       | 2.08    |
| 175        | 2.83    | 3.61    | 3.44     | 4.10     | 3.41 | 4.08    | 2.55      | 2.37       | 2.05    |
| 185        | 2.82    | 3.51    | 3.29     | 4.05     | 3.31 | 3.93    | 2.39      | 2.18       | 2.03    |
| 195        | 2.74    | 3.39    | 3.20     | 3.85     | 3.26 | 3.78    | 2.34      | 2.16       | 1.96    |
| 205        | 2.65    | 3.31    | 3.14     | 3.86     | 3.34 | 3.76    | 2.30      | 1.91       | 1.89    |
| 215        | 2.54    | 3.13    | 3.02     | 3.69     | 3.11 | 3.66    | 2.08      | 2.06       | 1.99    |
| 225        | 2.46    | 3.05    | 2.83     | 3.76     | 3.11 | 3.60    | 2.09      | 1.87       | 1.82    |
| 235        | 2.41    | 3.02    | 2.78     | 3.57     | 3.31 | 3.15    | 1.99      | 1.93       | 1.78    |

**Table S5.** Standard uptake values (SUV) vs. time used to generate the TACs in Figure 8 for the baseline study with [<sup>18</sup>F]4.

| Time (min) | Caudate | Putamen | Thalamus | Midbrain | Pons | Medulla | Occipital | Cerebellum | Frontal |
|------------|---------|---------|----------|----------|------|---------|-----------|------------|---------|
| 0.5        | 0.01    | 0.01    | 0.01     | 0.01     | 0.01 | 0.02    | 0.01      | 0.01       | 0.01    |
| 1.5        | 0.31    | 0.30    | 0.34     | 0.48     | 0.38 | 0.42    | 0.30      | 0.48       | 0.25    |
| 2.5        | 0.83    | 1.34    | 1.12     | 1.48     | 0.90 | 1.62    | 1.03      | 1.41       | 0.79    |
| 3.5        | 1.70    | 2.28    | 1.89     | 2.59     | 1.87 | 2.91    | 1.51      | 2.81       | 1.47    |
| 4.5        | 2.17    | 3.11    | 2.48     | 3.08     | 2.44 | 3.95    | 2.44      | 3.51       | 1.85    |
| 6.5        | 3.14    | 4.42    | 3.71     | 4.35     | 3.60 | 5.26    | 3.31      | 5.03       | 2.95    |
| 9.5        | 3.93    | 5.12    | 4.02     | 5.04     | 4.14 | 5.63    | 3.77      | 5.92       | 3.19    |
| 12.5       | 4.23    | 5.25    | 4.31     | 5.24     | 4.51 | 5.82    | 4.02      | 5.72       | 3.50    |
| 15.5       | 4.30    | 5.53    | 4.64     | 5.70     | 4.79 | 5.77    | 4.29      | 5.62       | 3.38    |
| 18.5       | 4.53    | 5.83    | 4.77     | 5.49     | 4.55 | 5.87    | 4.35      | 6.08       | 3.70    |
| 22.5       | 4.63    | 5.81    | 5.02     | 5.88     | 4.89 | 6.29    | 4.50      | 5.90       | 3.74    |
| 27.5       | 4.94    | 5.95    | 5.08     | 6.06     | 5.03 | 6.12    | 4.71      | 5.61       | 3.80    |
| 35         | 5.13    | 6.11    | 5.26     | 6.14     | 5.08 | 5.92    | 4.66      | 5.43       | 3.74    |
| 45         | 5.32    | 6.05    | 5.49     | 6.06     | 4.85 | 5.80    | 4.61      | 5.11       | 3.72    |
| 55         | 5.31    | 5.97    | 5.46     | 6.10     | 4.72 | 5.66    | 4.59      | 4.63       | 3.67    |
| 65         | 5.22    | 5.78    | 5.39     | 6.06     | 4.93 | 5.61    | 4.52      | 4.29       | 3.69    |
| 75         | 5.17    | 5.63    | 5.33     | 6.07     | 4.67 | 5.49    | 4.29      | 4.02       | 3.49    |
| 85         | 5.23    | 5.54    | 5.27     | 5.86     | 4.59 | 5.41    | 4.19      | 3.83       | 3.32    |
| 95         | 5.03    | 5.28    | 5.16     | 5.79     | 4.68 | 5.59    | 4.16      | 3.81       | 3.31    |
| 105        | 4.90    | 5.21    | 5.06     | 5.59     | 4.38 | 5.19    | 3.91      | 3.49       | 3.19    |
| 115        | 4.71    | 5.03    | 4.82     | 5.52     | 4.20 | 5.07    | 3.72      | 3.29       | 3.20    |
| 125        | 4.63    | 4.82    | 4.71     | 5.50     | 4.30 | 4.99    | 3.64      | 3.11       | 2.93    |
| 135        | 4.43    | 4.74    | 4.58     | 5.36     | 4.03 | 4.99    | 3.57      | 2.89       | 2.80    |
| 145        | 4.38    | 4.58    | 4.62     | 5.18     | 4.35 | 4.91    | 3.50      | 2.80       | 2.85    |
| 155        | 4.18    | 4.38    | 4.27     | 5.23     | 4.03 | 4.48    | 3.27      | 2.62       | 2.65    |
| 165        | 4.01    | 4.31    | 4.31     | 5.06     | 3.84 | 4.42    | 3.22      | 2.57       | 2.58    |
| 175        | 4.04    | 4.10    | 4.00     | 4.91     | 3.78 | 4.26    | 3.06      | 2.45       | 2.51    |
| 182.5      | 3.95    | 4.09    | 3.94     | 4.79     | 3.71 | 4.22    | 2.93      | 2.27       | 2.40    |
| 187.5      | 3.83    | 3.87    | 3.88     | 4.65     | 3.85 | 4.04    | 3.05      | 2.35       | 2.39    |
| 192.5      | 3.75    | 3.92    | 3.83     | 4.52     | 3.48 | 3.98    | 2.86      | 2.38       | 2.16    |
| 197.5      | 3.62    | 3.78    | 3.74     | 4.54     | 3.36 | 3.73    | 2.91      | 2.16       | 2.23    |
| 202.5      | 3.64    | 3.82    | 3.84     | 4.46     | 3.68 | 3.68    | 2.71      | 2.13       | 2.23    |
| 207.5      | 3.41    | 3.65    | 3.35     | 4.46     | 3.24 | 3.58    | 2.68      | 1.86       | 2.03    |
| 215        | 3.62    | 3.51    | 3.62     | 4.58     | 3.17 | 3.67    | 2.70      | 2.10       | 2.03    |
| 225        | 3.46    | 3.51    | 3.52     | 4.29     | 3.21 | 3.64    | 2.54      | 2.03       | 1.97    |
| 235        | 3.28    | 3.27    | 3.48     | 4.33     | 3.26 | 3.34    | 2.53      | 1.87       | 2.01    |

**Table S6.** Ratio of uptake in specific brain regions vs. cerebellum uptake for the microPET baseline study performed with [<sup>18</sup>F]1.

| Time (min) | Caudate | Putamen | Thalamus | Midbrain | Pons | Medulla | Occipital | Frontal |
|------------|---------|---------|----------|----------|------|---------|-----------|---------|
| 0.5        | 1.1     | 1.5     | 1.3      | 1.3      | 1.7  | 1.6     | 0.8       | 0.9     |
| 1.5        | 0.7     | 0.9     | 0.9      | 1.0      | 0.9  | 1.2     | 0.6       | 0.5     |
| 2.5        | 0.8     | 1.0     | 0.9      | 1.2      | 1.0  | 1.1     | 0.7       | 0.6     |
| 3.5        | 0.7     | 0.8     | 0.8      | 1.0      | 0.7  | 1.0     | 0.6       | 0.6     |
| 4.5        | 0.6     | 0.8     | 0.8      | 1.0      | 0.6  | 0.9     | 0.6       | 0.6     |
| 6.5        | 0.7     | 0.9     | 0.8      | 1.0      | 0.7  | 0.9     | 0.7       | 0.6     |
| 9.5        | 0.7     | 0.9     | 0.9      | 1.0      | 0.7  | 0.9     | 0.7       | 0.6     |
| 12.5       | 0.7     | 0.9     | 0.9      | 1.1      | 0.7  | 0.9     | 0.7       | 0.6     |
| 15.5       | 0.8     | 0.9     | 0.9      | 1.1      | 0.7  | 0.9     | 0.7       | 0.6     |
| 18.5       | 0.8     | 1.0     | 0.9      | 1.1      | 0.7  | 0.9     | 0.7       | 0.7     |
| 22.5       | 0.8     | 1.0     | 1.0      | 1.1      | 0.8  | 1.0     | 0.7       | 0.7     |
| 27.5       | 0.8     | 1.0     | 1.0      | 1.1      | 0.8  | 1.0     | 0.8       | 0.7     |
| 35         | 0.9     | 1.1     | 1.1      | 1.2      | 0.8  | 1.0     | 0.8       | 0.7     |
| 45         | 1.0     | 1.2     | 1.2      | 1.3      | 0.9  | 1.1     | 0.8       | 0.8     |
| 55         | 1.1     | 1.2     | 1.2      | 1.4      | 0.9  | 1.1     | 0.9       | 0.8     |
| 65         | 1.1     | 1.3     | 1.3      | 1.5      | 1.0  | 1.2     | 0.9       | 0.9     |
| 75         | 1.2     | 1.4     | 1.4      | 1.6      | 1.1  | 1.3     | 0.9       | 0.9     |
| 85         | 1.2     | 1.5     | 1.4      | 1.7      | 1.1  | 1.3     | 0.9       | 0.9     |
| 95         | 1.3     | 1.5     | 1.5      | 1.7      | 1.2  | 1.4     | 0.9       | 1.0     |
| 105        | 1.4     | 1.6     | 1.6      | 1.8      | 1.3  | 1.5     | 1.0       | 1.0     |
| 115        | 1.4     | 1.7     | 1.6      | 1.9      | 1.3  | 1.5     | 0.9       | 1.0     |
| 125        | 1.4     | 1.7     | 1.6      | 2.0      | 1.3  | 1.6     | 0.9       | 1.0     |
| 135        | 1.5     | 1.8     | 1.7      | 2.0      | 1.4  | 1.7     | 0.9       | 1.1     |
| 145        | 1.5     | 1.8     | 1.7      | 2.1      | 1.4  | 1.6     | 0.9       | 1.1     |
| 155        | 1.5     | 1.8     | 1.7      | 2.1      | 1.4  | 1.7     | 0.9       | 1.1     |
| 165        | 1.5     | 1.8     | 1.8      | 2.1      | 1.5  | 1.7     | 1.0       | 1.1     |
| 175        | 1.5     | 1.9     | 1.8      | 2.2      | 1.5  | 1.8     | 1.0       | 1.1     |
| 182.5      | 1.5     | 1.8     | 1.8      | 2.2      | 1.4  | 1.8     | 1.0       | 1.1     |
| 187.5      | 1.5     | 1.8     | 1.8      | 2.2      | 1.5  | 1.8     | 0.9       | 1.1     |
| 192.5      | 1.5     | 1.8     | 1.7      | 2.2      | 1.4  | 1.7     | 0.9       | 1.1     |
| 197.5      | 1.6     | 1.9     | 1.7      | 2.3      | 1.6  | 1.8     | 1.0       | 1.1     |
| 202.5      | 1.6     | 1.8     | 1.8      | 2.2      | 1.6  | 1.8     | 0.9       | 1.0     |
| 207.5      | 1.5     | 1.8     | 1.7      | 2.3      | 1.6  | 1.8     | 0.9       | 1.1     |
| 215        | 1.5     | 1.8     | 1.7      | 2.2      | 1.5  | 1.7     | 0.9       | 1.1     |
| 225        | 1.6     | 1.9     | 1.8      | 2.4      | 1.6  | 1.9     | 1.0       | 1.1     |
| 235        | 1.5     | 1.8     | 1.7      | 2.3      | 1.5  | 1.8     | 0.9       | 1.1     |

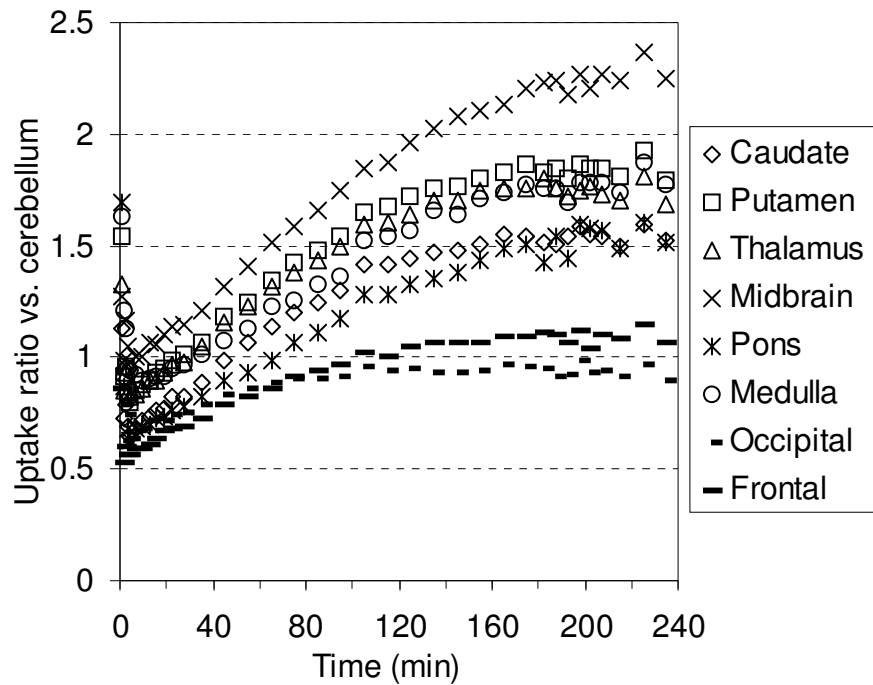

**Figure S1.** Graph of the change in the uptake ratio with time for the microPET baseline study performed with  $[^{18}\text{F}]\mathbf{1}$ .

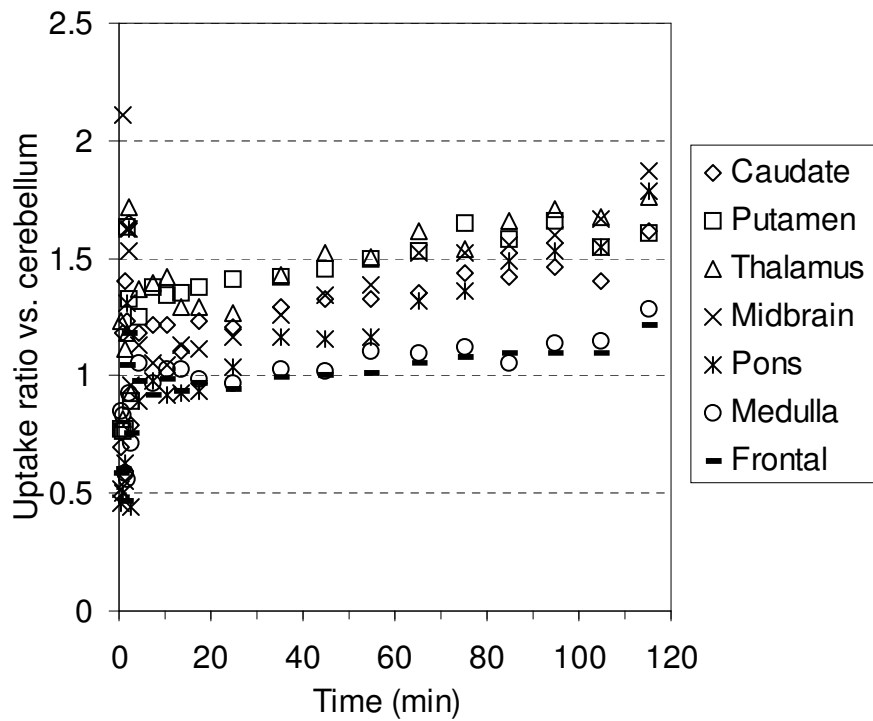

**Figure S2.** Graph of the change in the uptake ratio with time for the awake rhesus HRRT baseline study performed with  $[^{18}\text{F}]\mathbf{1}$ .



**Table S7.** Ratio of uptake in specific brain regions vs. cerebellum uptake for the awake rhesus HRRT baseline study performed with [ $^{18}\text{F}$ ]1.

| Time (min) | Putamen | Caudate | Thalamus | Frontal | Medulla | Pons | Midbrain |
|------------|---------|---------|----------|---------|---------|------|----------|
| 0.25       | 0.8     | 0.7     | 1.2      | 0.6     | 0.9     | 0.5  | 0.5      |
| 0.75       | 0.8     | 1.2     | 0.8      | 0.6     | 0.8     | 0.5  | 2.1      |
| 1.25       | 0.8     | 1.4     | 1.1      | 0.5     | 0.6     | 0.6  | 0.6      |
| 1.75       | 1.6     | 1.2     | 1.2      | 1.1     | 0.6     | 1.3  | 1.6      |
| 2.25       | 1.3     | 1.7     | 1.7      | 1.2     | 0.9     | 1.6  | 1.5      |
| 2.75       | 0.9     | 0.8     | 0.9      | 0.8     | 0.7     | 0.4  | 1.0      |
| 4.5        | 1.3     | 1.2     | 1.4      | 1.0     | 1.1     | 0.9  | 1.1      |
| 7.5        | 1.4     | 1.2     | 1.4      | 0.9     | 1.0     | 1.0  | 1.1      |
| 10.5       | 1.3     | 1.2     | 1.4      | 1.0     | 1.0     | 0.9  | 1.0      |
| 13.5       | 1.4     | 1.1     | 1.3      | 0.9     | 1.0     | 0.9  | 1.1      |
| 17.5       | 1.4     | 1.2     | 1.3      | 1.0     | 1.0     | 0.9  | 1.1      |
| 25         | 1.4     | 1.2     | 1.3      | 0.9     | 1.0     | 1.0  | 1.2      |
| 35         | 1.4     | 1.3     | 1.4      | 1.0     | 1.0     | 1.2  | 1.3      |
| 45         | 1.5     | 1.3     | 1.5      | 1.0     | 1.0     | 1.2  | 1.3      |
| 55         | 1.5     | 1.3     | 1.5      | 1.0     | 1.1     | 1.2  | 1.4      |
| 65         | 1.5     | 1.4     | 1.6      | 1.1     | 1.1     | 1.3  | 1.5      |
| 75         | 1.6     | 1.4     | 1.5      | 1.1     | 1.1     | 1.4  | 1.5      |
| 85         | 1.6     | 1.4     | 1.7      | 1.1     | 1.1     | 1.5  | 1.6      |
| 95         | 1.7     | 1.5     | 1.7      | 1.1     | 1.1     | 1.5  | 1.6      |
| 105        | 1.5     | 1.4     | 1.7      | 1.1     | 1.1     | 1.5  | 1.7      |
| 115        | 1.6     | 1.6     | 1.8      | 1.2     | 1.3     | 1.8  | 1.9      |

**Table S8.** Ratio of uptake in specific brain regions vs. cerebellum uptake for the microPET baseline study performed with [<sup>18</sup>F]2.

| Time (min) | Caudate | Putamen | Thalamus | Midbrain | Pons | Medulla | Frontal | Occipital |
|------------|---------|---------|----------|----------|------|---------|---------|-----------|
| 0.5        | 0.9     | 1.3     | 1.0      | 1.4      | 3.8  | 0.6     | 0.6     | 1.6       |
| 1.5        | 0.6     | 1.0     | 1.3      | 1.3      | 1.6  | 1.3     | 0.7     | 1.1       |
| 2.5        | 0.9     | 0.9     | 0.7      | 1.3      | 1.0  | 1.4     | 0.5     | 0.8       |
| 3.5        | 0.6     | 0.9     | 0.6      | 0.8      | 0.7  | 1.1     | 0.5     | 0.6       |
| 4.5        | 0.6     | 1.0     | 0.8      | 1.0      | 1.0  | 1.2     | 0.6     | 0.7       |
| 6.5        | 0.7     | 1.1     | 0.9      | 1.1      | 1.0  | 1.3     | 0.6     | 0.8       |
| 9.5        | 0.7     | 1.1     | 0.9      | 1.1      | 1.0  | 1.2     | 0.6     | 0.8       |
| 12.5       | 0.8     | 1.1     | 0.9      | 1.1      | 1.0  | 1.2     | 0.7     | 0.8       |
| 15.5       | 0.8     | 1.1     | 0.9      | 1.1      | 1.0  | 1.2     | 0.7     | 0.8       |
| 18.5       | 0.8     | 1.2     | 0.9      | 1.2      | 1.1  | 1.2     | 0.7     | 0.8       |
| 22.5       | 0.8     | 1.1     | 0.9      | 1.1      | 1.0  | 1.2     | 0.7     | 0.8       |
| 27.5       | 0.9     | 1.2     | 1.0      | 1.2      | 1.1  | 1.2     | 0.7     | 0.9       |
| 35         | 0.9     | 1.3     | 1.0      | 1.2      | 1.1  | 1.3     | 0.7     | 0.9       |
| 45         | 1.0     | 1.3     | 1.1      | 1.3      | 1.2  | 1.3     | 0.8     | 0.9       |
| 55         | 1.1     | 1.4     | 1.2      | 1.4      | 1.2  | 1.3     | 0.8     | 1.0       |
| 65         | 1.2     | 1.5     | 1.3      | 1.4      | 1.3  | 1.4     | 0.8     | 1.0       |
| 75         | 1.2     | 1.5     | 1.3      | 1.5      | 1.4  | 1.4     | 0.9     | 1.1       |
| 85         | 1.3     | 1.6     | 1.4      | 1.5      | 1.4  | 1.5     | 0.9     | 1.0       |
| 95         | 1.4     | 1.6     | 1.4      | 1.6      | 1.4  | 1.5     | 0.9     | 1.0       |
| 105        | 1.4     | 1.7     | 1.5      | 1.7      | 1.5  | 1.5     | 0.9     | 1.1       |
| 115        | 1.5     | 1.7     | 1.5      | 1.7      | 1.6  | 1.5     | 1.0     | 1.1       |
| 125        | 1.4     | 1.7     | 1.5      | 1.8      | 1.6  | 1.5     | 1.0     | 1.1       |
| 135        | 1.5     | 1.8     | 1.7      | 1.9      | 1.8  | 1.7     | 1.1     | 1.1       |
| 145        | 1.5     | 1.8     | 1.6      | 2.0      | 1.8  | 1.7     | 1.1     | 1.2       |
| 155        | 1.6     | 1.8     | 1.7      | 2.1      | 1.8  | 1.7     | 1.1     | 1.2       |
| 165        | 1.6     | 1.8     | 1.7      | 2.0      | 1.8  | 1.8     | 1.1     | 1.1       |
| 175        | 1.6     | 1.9     | 1.7      | 2.0      | 1.8  | 1.8     | 1.1     | 1.2       |
| 185        | 1.8     | 2.0     | 1.9      | 2.2      | 1.9  | 1.9     | 1.2     | 1.3       |
| 195        | 1.7     | 2.0     | 1.8      | 2.2      | 2.0  | 1.9     | 1.2     | 1.1       |
| 205        | 1.6     | 1.9     | 1.8      | 2.2      | 1.9  | 1.7     | 1.1     | 1.3       |
| 215        | 1.6     | 1.8     | 1.6      | 2.1      | 1.8  | 1.7     | 1.1     | 1.1       |
| 225        | 1.8     | 1.8     | 1.8      | 2.3      | 1.7  | 1.6     | 1.1     | 1.2       |
| 235        | 1.6     | 1.8     | 1.8      | 2.3      | 1.9  | 1.7     | 1.2     | 1.2       |

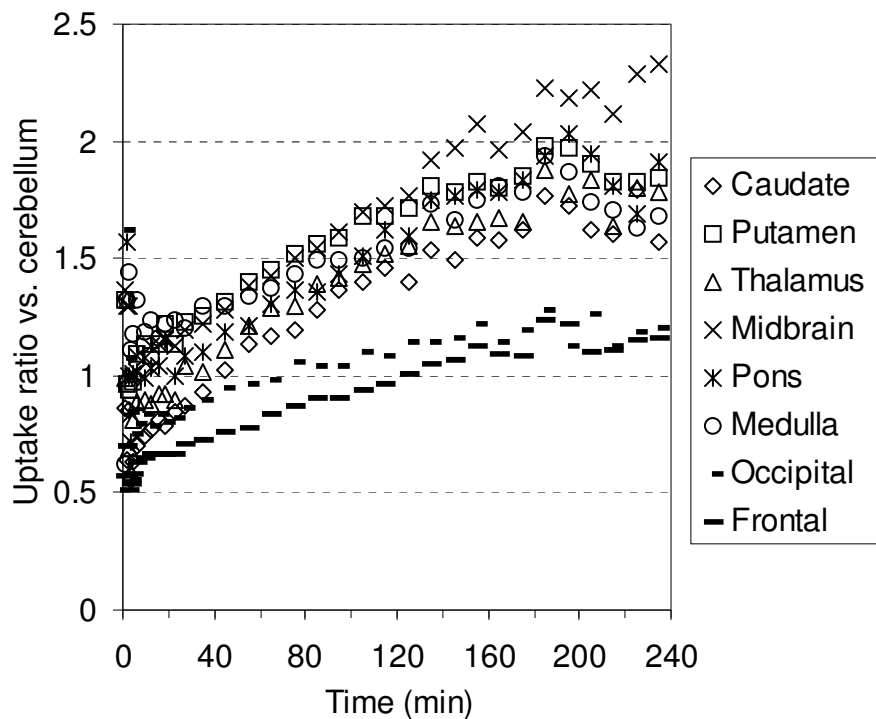

**Figure S3.** Graph of the change in the uptake ratio with time for the microPET baseline study performed with  $[^{18}\text{F}]2$ .

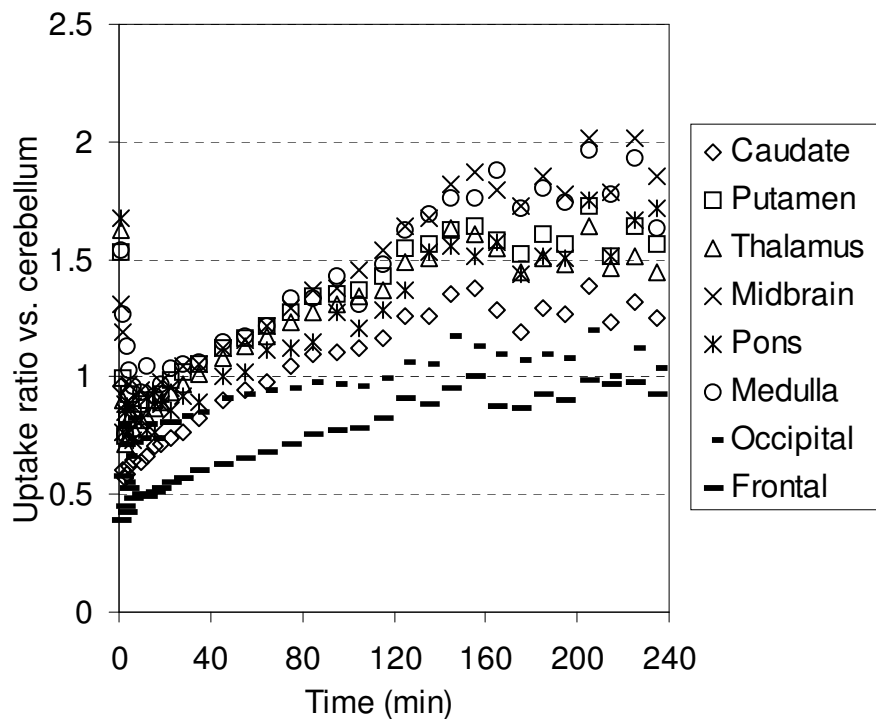

**Figure S4.** Graph of the change in the uptake ratio with time for the microPET baseline study performed with  $[^{18}\text{F}]3$ .

**Table S9.** Ratio of uptake in specific brain regions vs. cerebellum uptake for the microPET baseline study performed with [<sup>18</sup>F]3.

| Time(min) | Caudate | Putamen | Thalamus | Midbrain | Pons | Medulla | Occipital | Frontal |
|-----------|---------|---------|----------|----------|------|---------|-----------|---------|
| 0.5       | 1.0     | 1.5     | 1.6      | 1.3      | 1.7  | 1.5     | 0.8       | 0.4     |
| 1.5       | 0.6     | 1.0     | 0.9      | 1.2      | 0.8  | 1.3     | 0.7       | 0.6     |
| 2.5       | 0.6     | 0.8     | 0.7      | 0.9      | 0.8  | 0.8     | 0.6       | 0.5     |
| 3.5       | 0.6     | 0.8     | 0.7      | 0.9      | 0.9  | 1.1     | 0.7       | 0.4     |
| 4.5       | 0.6     | 0.9     | 0.8      | 1.0      | 0.8  | 1.0     | 0.8       | 0.5     |
| 6.5       | 0.6     | 0.8     | 0.8      | 0.9      | 0.7  | 1.0     | 0.7       | 0.5     |
| 9.5       | 0.6     | 0.9     | 0.8      | 0.9      | 0.8  | 0.9     | 0.7       | 0.5     |
| 12.5      | 0.7     | 0.9     | 0.8      | 0.9      | 0.8  | 1.0     | 0.8       | 0.5     |
| 15.5      | 0.7     | 0.9     | 0.9      | 0.9      | 0.8  | 0.9     | 0.7       | 0.5     |
| 18.5      | 0.7     | 0.9     | 0.9      | 1.0      | 0.9  | 1.0     | 0.8       | 0.5     |
| 22.5      | 0.7     | 1.0     | 0.9      | 1.0      | 0.9  | 1.0     | 0.8       | 0.6     |
| 27.5      | 0.8     | 1.0     | 1.0      | 1.0      | 0.9  | 1.1     | 0.8       | 0.6     |
| 35        | 0.8     | 1.1     | 1.0      | 1.1      | 0.9  | 1.1     | 0.8       | 0.6     |
| 45        | 0.9     | 1.1     | 1.1      | 1.1      | 1.0  | 1.1     | 0.9       | 0.6     |
| 55        | 0.9     | 1.2     | 1.1      | 1.2      | 1.0  | 1.2     | 0.9       | 0.7     |
| 65        | 1.0     | 1.2     | 1.2      | 1.2      | 1.1  | 1.2     | 0.9       | 0.7     |
| 75        | 1.0     | 1.3     | 1.2      | 1.3      | 1.1  | 1.3     | 0.9       | 0.7     |
| 85        | 1.1     | 1.3     | 1.3      | 1.4      | 1.1  | 1.3     | 1.0       | 0.8     |
| 95        | 1.1     | 1.4     | 1.3      | 1.4      | 1.3  | 1.4     | 1.0       | 0.8     |
| 105       | 1.1     | 1.4     | 1.3      | 1.5      | 1.2  | 1.3     | 1.0       | 0.8     |
| 115       | 1.2     | 1.4     | 1.4      | 1.5      | 1.3  | 1.5     | 1.0       | 0.8     |
| 125       | 1.3     | 1.5     | 1.5      | 1.6      | 1.4  | 1.6     | 1.1       | 0.9     |
| 135       | 1.3     | 1.6     | 1.5      | 1.7      | 1.5  | 1.7     | 1.1       | 0.9     |
| 145       | 1.3     | 1.6     | 1.6      | 1.8      | 1.6  | 1.8     | 1.2       | 1.0     |
| 155       | 1.4     | 1.6     | 1.6      | 1.9      | 1.5  | 1.8     | 1.1       | 1.0     |
| 165       | 1.3     | 1.6     | 1.6      | 1.8      | 1.6  | 1.9     | 1.1       | 0.9     |
| 175       | 1.2     | 1.5     | 1.4      | 1.7      | 1.4  | 1.7     | 1.1       | 0.9     |
| 185       | 1.3     | 1.6     | 1.5      | 1.9      | 1.5  | 1.8     | 1.1       | 0.9     |
| 195       | 1.3     | 1.6     | 1.5      | 1.8      | 1.5  | 1.7     | 1.1       | 0.9     |
| 205       | 1.4     | 1.7     | 1.6      | 2.0      | 1.7  | 2.0     | 1.2       | 1.0     |
| 215       | 1.2     | 1.5     | 1.5      | 1.8      | 1.5  | 1.8     | 1.0       | 1.0     |
| 225       | 1.3     | 1.6     | 1.5      | 2.0      | 1.7  | 1.9     | 1.1       | 1.0     |
| 235       | 1.3     | 1.6     | 1.4      | 1.9      | 1.7  | 1.6     | 1.0       | 0.9     |

**Table S10.** Ratio of uptake in specific brain regions vs. cerebellum uptake for the microPET baseline study performed with [<sup>18</sup>F]4.

| Time (min) | Caudate | Putamen | Thalamus | Midbrain | Pons | Medulla | Occipital | Frontal |
|------------|---------|---------|----------|----------|------|---------|-----------|---------|
| 0.5        | 0.9     | 0.8     | 1.3      | 0.7      | 1.6  | 2.4     | 1.0       | 0.7     |
| 1.5        | 0.6     | 0.6     | 0.7      | 1.0      | 0.8  | 0.9     | 0.6       | 0.5     |
| 2.5        | 0.6     | 1.0     | 0.8      | 1.0      | 0.6  | 1.1     | 0.7       | 0.6     |
| 3.5        | 0.6     | 0.8     | 0.7      | 0.9      | 0.7  | 1.0     | 0.5       | 0.5     |
| 4.5        | 0.6     | 0.9     | 0.7      | 0.9      | 0.7  | 1.1     | 0.7       | 0.5     |
| 6.5        | 0.6     | 0.9     | 0.7      | 0.9      | 0.7  | 1.0     | 0.7       | 0.6     |
| 9.5        | 0.7     | 0.9     | 0.7      | 0.9      | 0.7  | 1.0     | 0.6       | 0.5     |
| 12.5       | 0.7     | 0.9     | 0.8      | 0.9      | 0.8  | 1.0     | 0.7       | 0.6     |
| 15.5       | 0.8     | 1.0     | 0.8      | 1.0      | 0.9  | 1.0     | 0.8       | 0.6     |
| 18.5       | 0.7     | 1.0     | 0.8      | 0.9      | 0.7  | 1.0     | 0.7       | 0.6     |
| 22.5       | 0.8     | 1.0     | 0.9      | 1.0      | 0.8  | 1.1     | 0.8       | 0.6     |
| 27.5       | 0.9     | 1.1     | 0.9      | 1.1      | 0.9  | 1.1     | 0.8       | 0.7     |
| 35         | 0.9     | 1.1     | 1.0      | 1.1      | 0.9  | 1.1     | 0.9       | 0.7     |
| 45         | 1.0     | 1.2     | 1.1      | 1.2      | 0.9  | 1.1     | 0.9       | 0.7     |
| 55         | 1.1     | 1.3     | 1.2      | 1.3      | 1.0  | 1.2     | 1.0       | 0.8     |
| 65         | 1.2     | 1.3     | 1.3      | 1.4      | 1.1  | 1.3     | 1.1       | 0.9     |
| 75         | 1.3     | 1.4     | 1.3      | 1.5      | 1.2  | 1.4     | 1.1       | 0.9     |
| 85         | 1.4     | 1.4     | 1.4      | 1.5      | 1.2  | 1.4     | 1.1       | 0.9     |
| 95         | 1.3     | 1.4     | 1.4      | 1.5      | 1.2  | 1.5     | 1.1       | 0.9     |
| 105        | 1.4     | 1.5     | 1.4      | 1.6      | 1.3  | 1.5     | 1.1       | 0.9     |
| 115        | 1.4     | 1.5     | 1.5      | 1.7      | 1.3  | 1.5     | 1.1       | 1.0     |
| 125        | 1.5     | 1.5     | 1.5      | 1.8      | 1.4  | 1.6     | 1.2       | 0.9     |
| 135        | 1.5     | 1.6     | 1.6      | 1.9      | 1.4  | 1.7     | 1.2       | 1.0     |
| 145        | 1.6     | 1.6     | 1.6      | 1.8      | 1.6  | 1.8     | 1.3       | 1.0     |
| 155        | 1.6     | 1.7     | 1.6      | 2.0      | 1.5  | 1.7     | 1.2       | 1.0     |
| 165        | 1.6     | 1.7     | 1.7      | 2.0      | 1.5  | 1.7     | 1.3       | 1.0     |
| 175        | 1.7     | 1.7     | 1.6      | 2.0      | 1.5  | 1.7     | 1.3       | 1.0     |
| 182.5      | 1.7     | 1.8     | 1.7      | 2.1      | 1.6  | 1.9     | 1.3       | 1.1     |
| 187.5      | 1.6     | 1.6     | 1.7      | 2.0      | 1.6  | 1.7     | 1.3       | 1.0     |
| 192.5      | 1.6     | 1.6     | 1.6      | 1.9      | 1.5  | 1.7     | 1.2       | 0.9     |
| 197.5      | 1.7     | 1.8     | 1.7      | 2.1      | 1.6  | 1.7     | 1.4       | 1.0     |
| 202.5      | 1.7     | 1.8     | 1.8      | 2.1      | 1.7  | 1.7     | 1.3       | 1.0     |
| 207.5      | 1.8     | 2.0     | 1.8      | 2.4      | 1.7  | 1.9     | 1.4       | 1.1     |
| 215        | 1.7     | 1.7     | 1.7      | 2.2      | 1.5  | 1.8     | 1.3       | 1.0     |
| 225        | 1.7     | 1.7     | 1.7      | 2.1      | 1.6  | 1.8     | 1.3       | 1.0     |
| 235        | 1.8     | 1.7     | 1.9      | 2.3      | 1.7  | 1.8     | 1.4       | 1.1     |

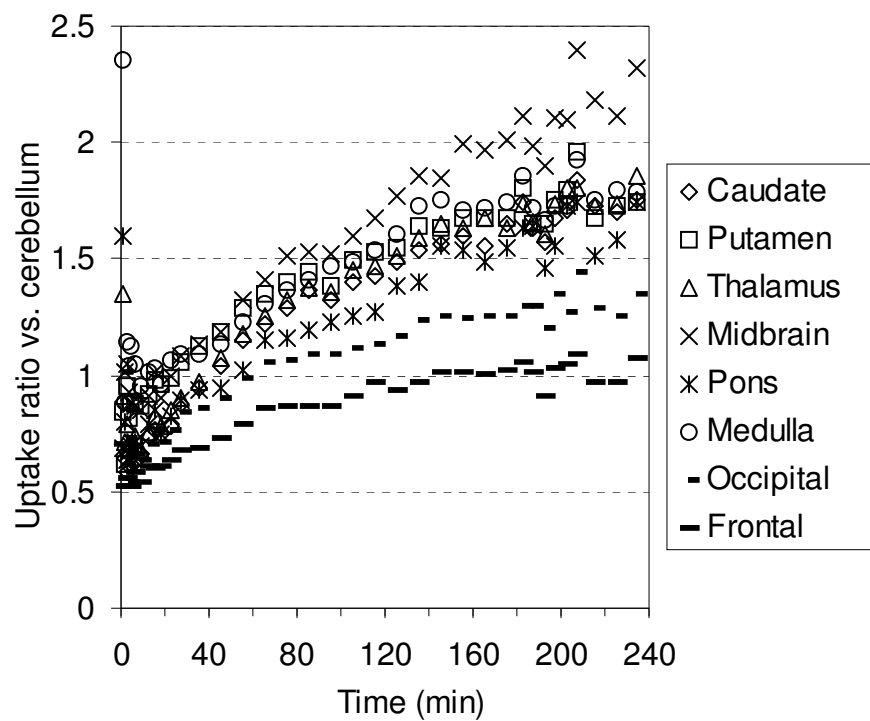

**Figure S5.** Graph of the change in the uptake ratio with time for the microPET baseline study performed with  $[^{18}\text{F}]4$ .

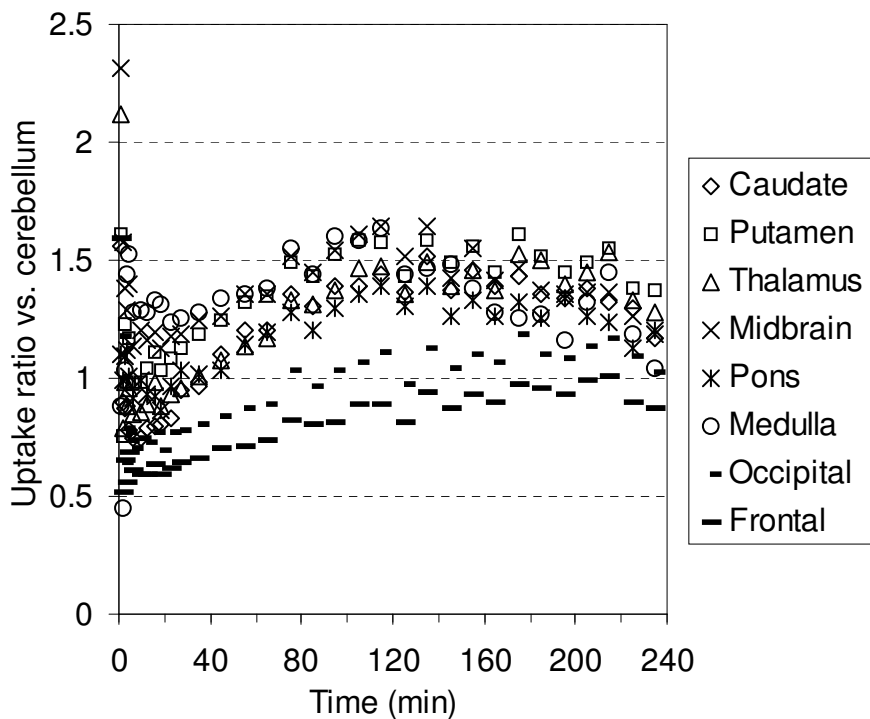

**Figure S6.** Graph of the change in the uptake ratio with time for the microPET chase study performed by chasing  $[^{18}\text{F}]1$  with **15** (see Figure 9).

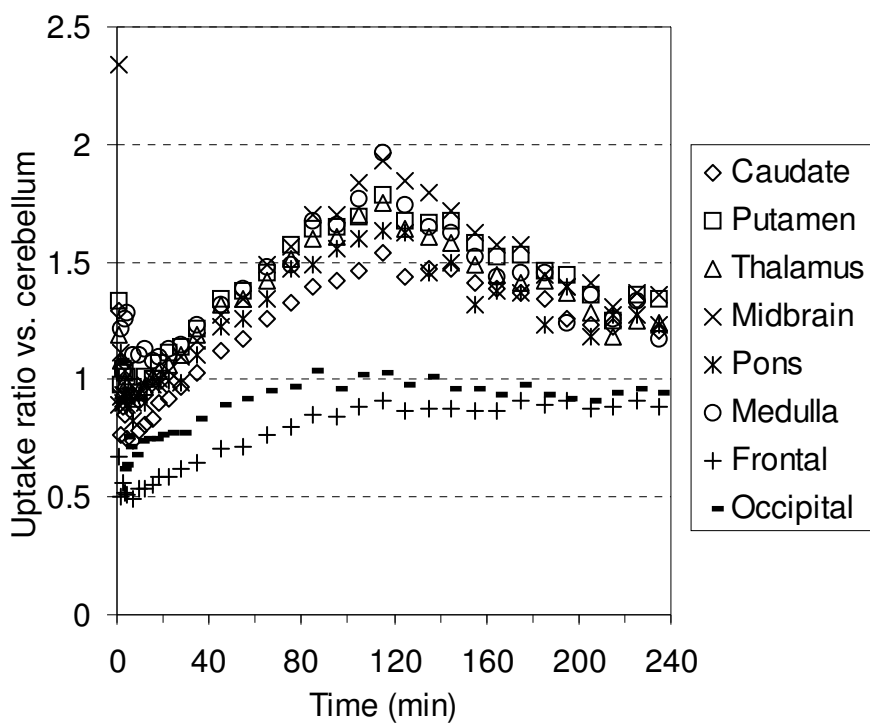

**Figure S7.** Graph of the change in the uptake ratio with time for the microPET chase study performed by chasing  $[^{18}\text{F}]\mathbf{2}$  with **15** (see Figure 10).

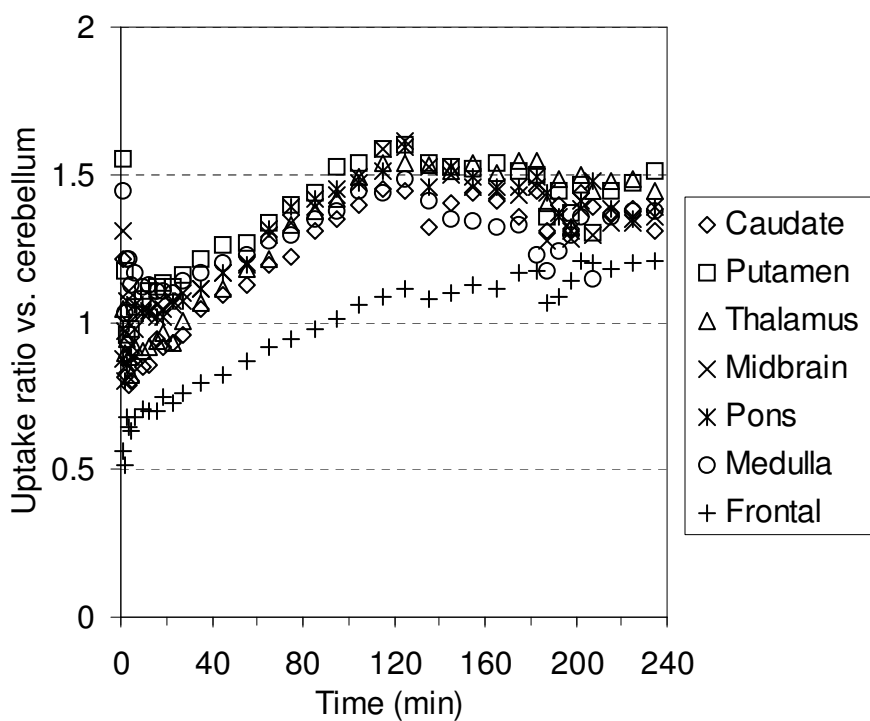

**Figure S8.** Graph of the change in the uptake ratio with time for the microPET chase study performed by chasing  $[^{18}\text{F}]\mathbf{3}$  with **15** (see Figure 11).

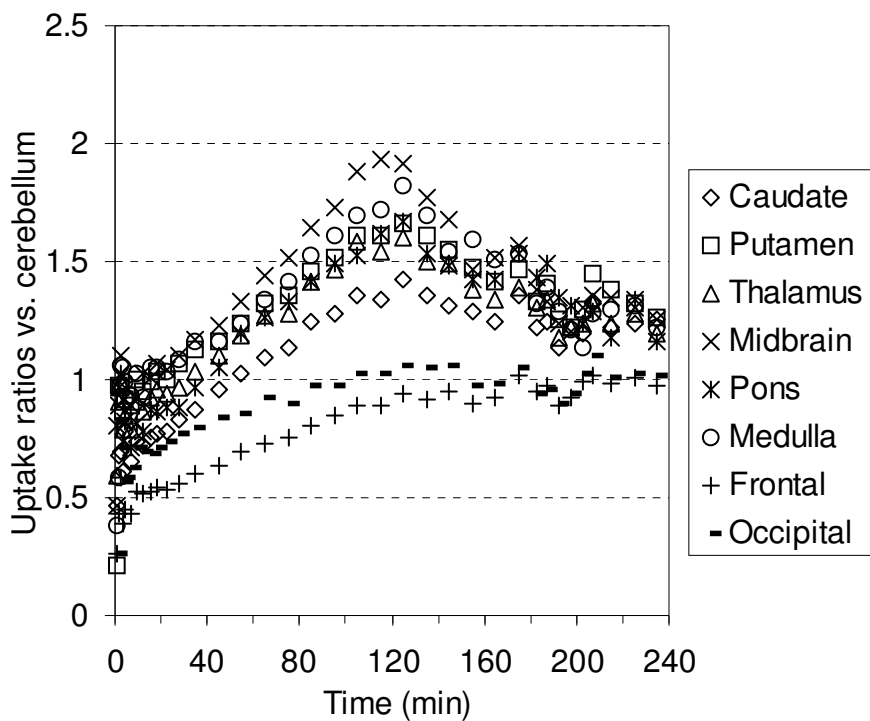

**Figure S9.** Graph of the change in the uptake ratio with time for the microPET chase study performed by chasing [ $^{18}\text{F}$ ]4 with 15 (see Figure 12).

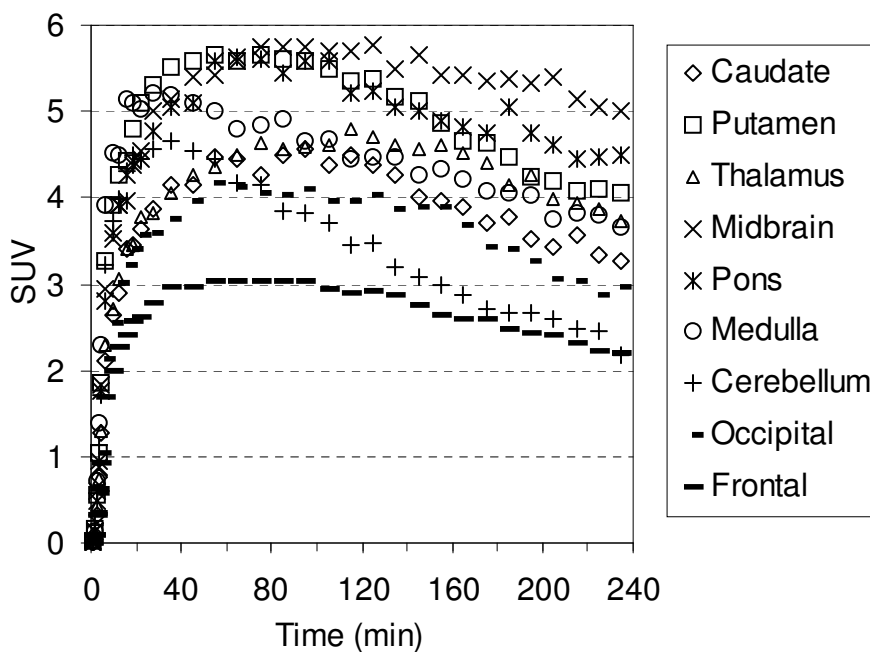

**Figure S10.** MicroPET TACs showing the results of injection of 16 (0.3 mg/kg) into an anesthetized cynomolgus monkey at 120 min post-injection of [ $^{18}\text{F}$ ]1.



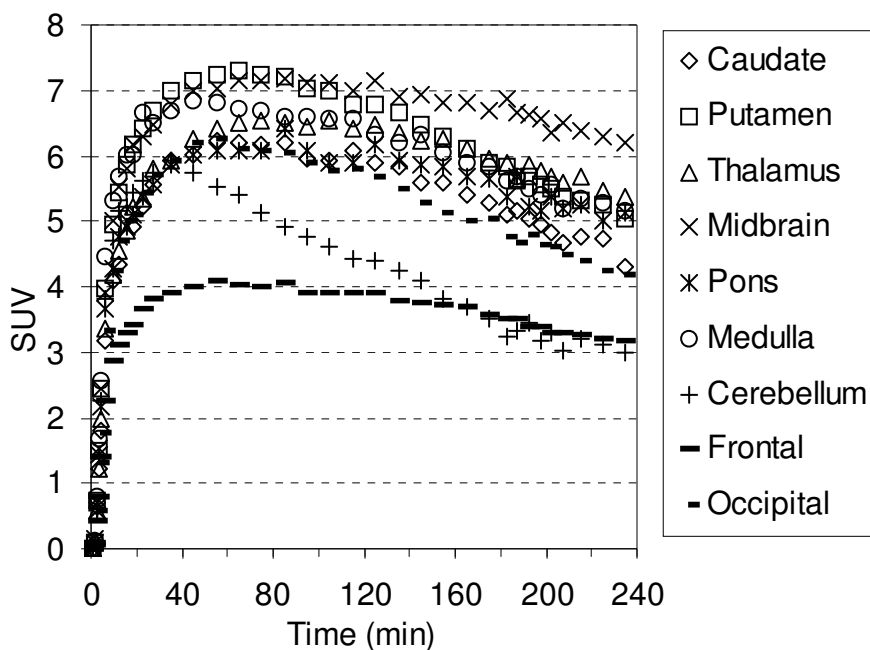

**Figure S11.** MicroPET TACs showing the results of injection of **17** (0.3 mg/kg) into an anesthetized cynomolgus monkey at 120 min post-injection of [ $^{18}\text{F}$ ]**1**.

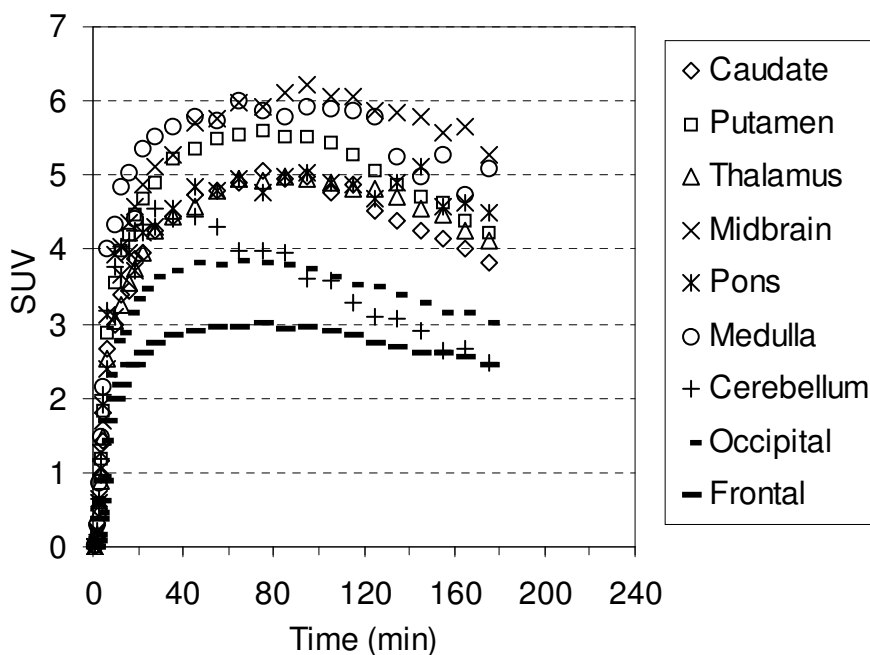

**Figure S12.** MicroPET TACs showing the results of injection of **16** (0.3 mg/kg) into an anesthetized cynomolgus monkey at 90 min post-injection of [ $^{18}\text{F}$ ]**2**.

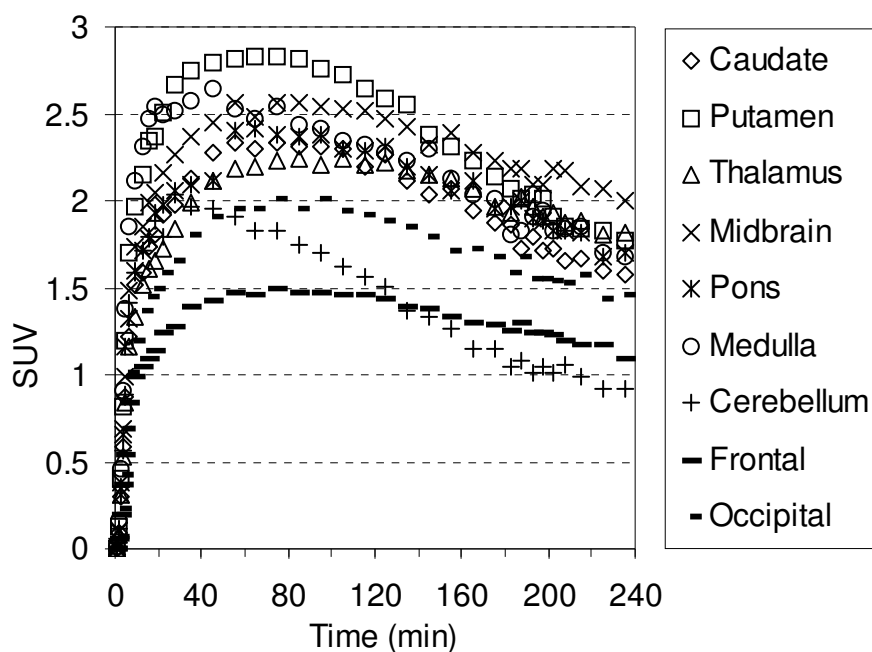

**Figure S13.** MicroPET TACs showing the results of injection of **16** (0.3 mg/kg) into an anesthetized cynomolgus monkey at 120 min post-injection of [<sup>18</sup>F]**3**.

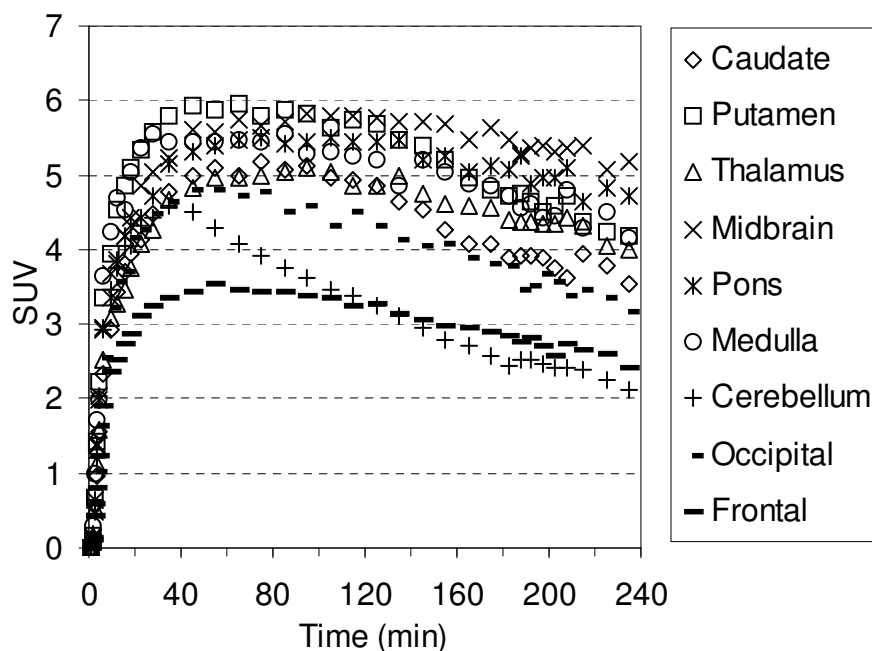

**Figure S14.** MicroPET TACs showing the results of injection of **16** (0.3 mg/kg) into an anesthetized cynomolgus monkey at 120 min post-injection of [<sup>18</sup>F]**4**.

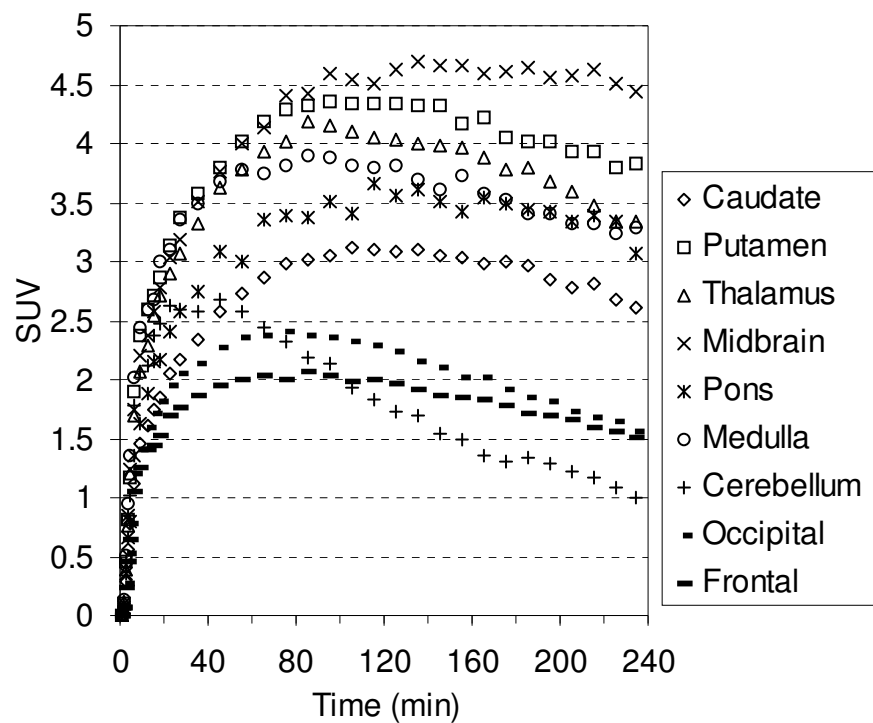

**Figure S15.** MicroPET baseline TACs obtained by injection of [ $^{18}\text{F}$ ]**19** into an anesthetized cynomolgus monkey (reproduced from Plisson, *et al.*, *J. Med. Chem.* **2007**, *50*, 4553-4560, Figure 3).

**Table S11.** Standard uptake values (SUV) vs. time used to generate the TACs in Figure S15 for the microPET baseline study with [<sup>18</sup>F]19.

| Time (min) | Caudate | Putamen | Thalamus | Midbrain | Pons | Medulla | Cerebellum | Occipital | Frontal |
|------------|---------|---------|----------|----------|------|---------|------------|-----------|---------|
| 0.5        | 0.00    | 0.00    | 0.00     | 0.00     | 0.00 | 0.00    | 0.00       | 0.00      | 0.00    |
| 1.5        | 0.07    | 0.11    | 0.11     | 0.10     | 0.06 | 0.14    | 0.10       | 0.07      | 0.06    |
| 2.5        | 0.29    | 0.45    | 0.40     | 0.40     | 0.36 | 0.50    | 0.45       | 0.28      | 0.24    |
| 3.5        | 0.56    | 0.82    | 0.76     | 0.84     | 0.67 | 0.94    | 0.85       | 0.53      | 0.46    |
| 4.5        | 0.78    | 1.18    | 1.21     | 1.23     | 0.80 | 1.36    | 1.02       | 0.77      | 0.64    |
| 6.5        | 1.13    | 1.89    | 1.70     | 1.74     | 1.36 | 2.02    | 1.79       | 1.21      | 1.05    |
| 9.5        | 1.47    | 2.38    | 2.06     | 2.20     | 1.62 | 2.45    | 2.07       | 1.41      | 1.25    |
| 12.5       | 1.61    | 2.59    | 2.29     | 2.38     | 1.88 | 2.59    | 2.13       | 1.60      | 1.41    |
| 15.5       | 1.74    | 2.71    | 2.54     | 2.58     | 2.14 | 2.67    | 2.38       | 1.71      | 1.43    |
| 18.5       | 1.84    | 2.87    | 2.70     | 2.78     | 2.17 | 3.01    | 2.47       | 1.81      | 1.53    |
| 22.5       | 2.05    | 3.13    | 2.90     | 3.04     | 2.40 | 3.09    | 2.63       | 1.94      | 1.69    |
| 27.5       | 2.17    | 3.38    | 3.06     | 3.19     | 2.58 | 3.35    | 2.59       | 2.05      | 1.76    |
| 35.0       | 2.33    | 3.57    | 3.31     | 3.51     | 2.74 | 3.49    | 2.58       | 2.13      | 1.86    |
| 45.0       | 2.58    | 3.80    | 3.63     | 3.76     | 3.09 | 3.69    | 2.69       | 2.28      | 1.95    |
| 55.0       | 2.73    | 4.02    | 3.78     | 4.01     | 2.99 | 3.78    | 2.58       | 2.35      | 2.00    |
| 65.0       | 2.87    | 4.18    | 3.92     | 4.13     | 3.35 | 3.75    | 2.44       | 2.38      | 2.03    |
| 75.0       | 2.98    | 4.28    | 4.02     | 4.41     | 3.39 | 3.82    | 2.32       | 2.41      | 2.01    |
| 85.0       | 3.03    | 4.32    | 4.18     | 4.42     | 3.38 | 3.91    | 2.18       | 2.37      | 2.06    |
| 95.0       | 3.05    | 4.36    | 4.15     | 4.60     | 3.50 | 3.88    | 2.14       | 2.35      | 2.03    |
| 105.0      | 3.13    | 4.34    | 4.11     | 4.55     | 3.40 | 3.82    | 1.93       | 2.33      | 1.98    |
| 115.0      | 3.11    | 4.34    | 4.06     | 4.50     | 3.65 | 3.80    | 1.83       | 2.29      | 1.99    |
| 125.0      | 3.09    | 4.34    | 4.04     | 4.62     | 3.56 | 3.81    | 1.73       | 2.24      | 1.97    |
| 135.0      | 3.10    | 4.33    | 3.99     | 4.70     | 3.60 | 3.69    | 1.69       | 2.16      | 1.92    |
| 145.0      | 3.05    | 4.31    | 3.98     | 4.65     | 3.51 | 3.61    | 1.54       | 2.11      | 1.87    |
| 155.0      | 3.03    | 4.18    | 3.97     | 4.65     | 3.43 | 3.73    | 1.49       | 2.02      | 1.84    |
| 165.0      | 2.99    | 4.22    | 3.88     | 4.60     | 3.54 | 3.58    | 1.36       | 2.02      | 1.82    |
| 175.0      | 3.00    | 4.06    | 3.78     | 4.61     | 3.49 | 3.52    | 1.30       | 1.92      | 1.77    |
| 185.0      | 2.97    | 4.01    | 3.80     | 4.64     | 3.44 | 3.41    | 1.34       | 1.85      | 1.71    |
| 195.0      | 2.85    | 4.01    | 3.67     | 4.56     | 3.42 | 3.41    | 1.29       | 1.82      | 1.70    |
| 205.0      | 2.77    | 3.94    | 3.59     | 4.57     | 3.34 | 3.32    | 1.22       | 1.73      | 1.66    |
| 215.0      | 2.81    | 3.93    | 3.47     | 4.63     | 3.39 | 3.32    | 1.18       | 1.68      | 1.60    |
| 225.0      | 2.68    | 3.79    | 3.35     | 4.51     | 3.34 | 3.24    | 1.08       | 1.64      | 1.56    |
| 235.0      | 2.61    | 3.83    | 3.34     | 4.44     | 3.06 | 3.30    | 1.01       | 1.56      | 1.51    |

**Table S12.** Ratio of uptake in specific brain regions vs. cerebellum uptake for the microPET baseline study performed with [<sup>18</sup>F]**19** (Figure S15).

| Time (min) | Caudate | Putamen | Thalamus | Midbrain | Pons | Medulla | Occipital | Frontal |
|------------|---------|---------|----------|----------|------|---------|-----------|---------|
| 1.5        | 0.7     | 1.1     | 1.1      | 1.0      | 0.6  | 1.4     | 0.7       | 0.6     |
| 2.5        | 0.6     | 1.0     | 0.9      | 0.9      | 0.8  | 1.1     | 0.6       | 0.5     |
| 3.5        | 0.7     | 1.0     | 0.9      | 1.0      | 0.8  | 1.1     | 0.6       | 0.5     |
| 4.5        | 0.8     | 1.2     | 1.2      | 1.2      | 0.8  | 1.3     | 0.8       | 0.6     |
| 6.5        | 0.6     | 1.1     | 1.0      | 1.0      | 0.8  | 1.1     | 0.7       | 0.6     |
| 9.5        | 0.7     | 1.1     | 1.0      | 1.1      | 0.8  | 1.2     | 0.7       | 0.6     |
| 12.5       | 0.8     | 1.2     | 1.1      | 1.1      | 0.9  | 1.2     | 0.8       | 0.7     |
| 15.5       | 0.7     | 1.1     | 1.1      | 1.1      | 0.9  | 1.1     | 0.7       | 0.6     |
| 18.5       | 0.7     | 1.2     | 1.1      | 1.1      | 0.9  | 1.2     | 0.7       | 0.6     |
| 22.5       | 0.8     | 1.2     | 1.1      | 1.2      | 0.9  | 1.2     | 0.7       | 0.6     |
| 27.5       | 0.8     | 1.3     | 1.2      | 1.2      | 1.0  | 1.3     | 0.8       | 0.7     |
| 35.0       | 0.9     | 1.4     | 1.3      | 1.4      | 1.1  | 1.4     | 0.8       | 0.7     |
| 45.0       | 1.0     | 1.4     | 1.4      | 1.4      | 1.1  | 1.4     | 0.8       | 0.7     |
| 55.0       | 1.1     | 1.6     | 1.5      | 1.6      | 1.2  | 1.5     | 0.9       | 0.8     |
| 65.0       | 1.2     | 1.7     | 1.6      | 1.7      | 1.4  | 1.5     | 1.0       | 0.8     |
| 75.0       | 1.3     | 1.8     | 1.7      | 1.9      | 1.5  | 1.6     | 1.0       | 0.9     |
| 85.0       | 1.4     | 2.0     | 1.9      | 2.0      | 1.5  | 1.8     | 1.1       | 0.9     |
| 95.0       | 1.4     | 2.0     | 1.9      | 2.2      | 1.6  | 1.8     | 1.1       | 0.9     |
| 105.0      | 1.6     | 2.2     | 2.1      | 2.4      | 1.8  | 2.0     | 1.2       | 1.0     |
| 115.0      | 1.7     | 2.4     | 2.2      | 2.5      | 2.0  | 2.1     | 1.3       | 1.1     |
| 125.0      | 1.8     | 2.5     | 2.3      | 2.7      | 2.1  | 2.2     | 1.3       | 1.1     |
| 135.0      | 1.8     | 2.6     | 2.4      | 2.8      | 2.1  | 2.2     | 1.3       | 1.1     |
| 145.0      | 2.0     | 2.8     | 2.6      | 3.0      | 2.3  | 2.3     | 1.4       | 1.2     |
| 155.0      | 2.0     | 2.8     | 2.7      | 3.1      | 2.3  | 2.5     | 1.4       | 1.2     |
| 165.0      | 2.2     | 3.1     | 2.9      | 3.4      | 2.6  | 2.6     | 1.5       | 1.3     |
| 175.0      | 2.3     | 3.1     | 2.9      | 3.5      | 2.7  | 2.7     | 1.5       | 1.4     |
| 185.0      | 2.2     | 3.0     | 2.8      | 3.5      | 2.6  | 2.5     | 1.4       | 1.3     |
| 195.0      | 2.2     | 3.1     | 2.8      | 3.5      | 2.6  | 2.6     | 1.4       | 1.3     |
| 205.0      | 2.3     | 3.2     | 3.0      | 3.8      | 2.7  | 2.7     | 1.4       | 1.4     |
| 215.0      | 2.4     | 3.3     | 3.0      | 3.9      | 2.9  | 2.8     | 1.4       | 1.4     |
| 225.0      | 2.5     | 3.5     | 3.1      | 4.2      | 3.1  | 3.0     | 1.5       | 1.4     |
| 235.0      | 2.6     | 3.8     | 3.3      | 4.4      | 3.0  | 3.3     | 1.6       | 1.5     |

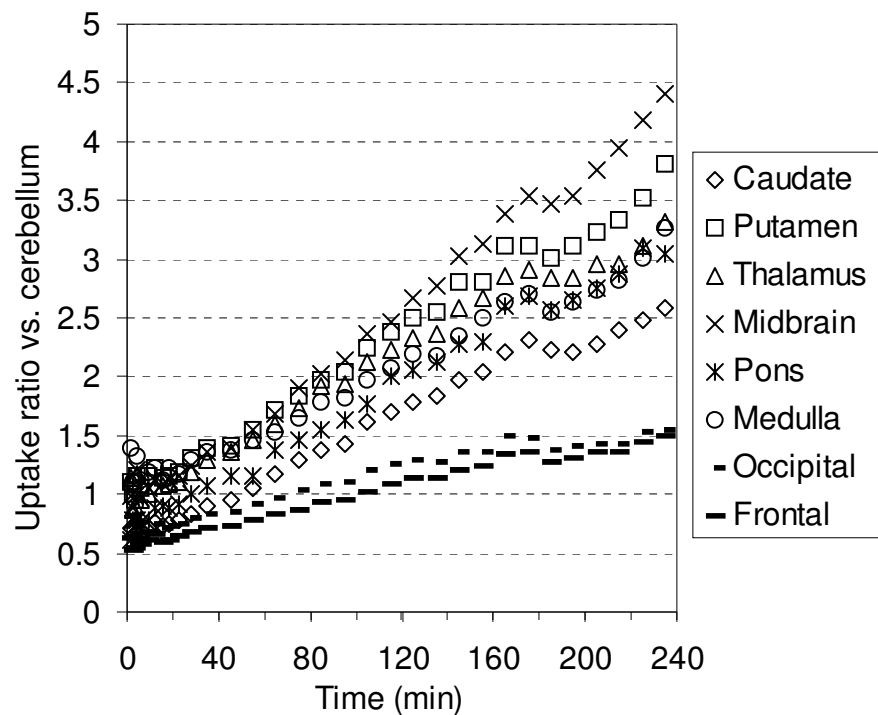

**Figure S16.** Graph of the change in uptake ratio with time for the microPET baseline study performed with [ $^{18}\text{F}$ ]19 (Figure S15).

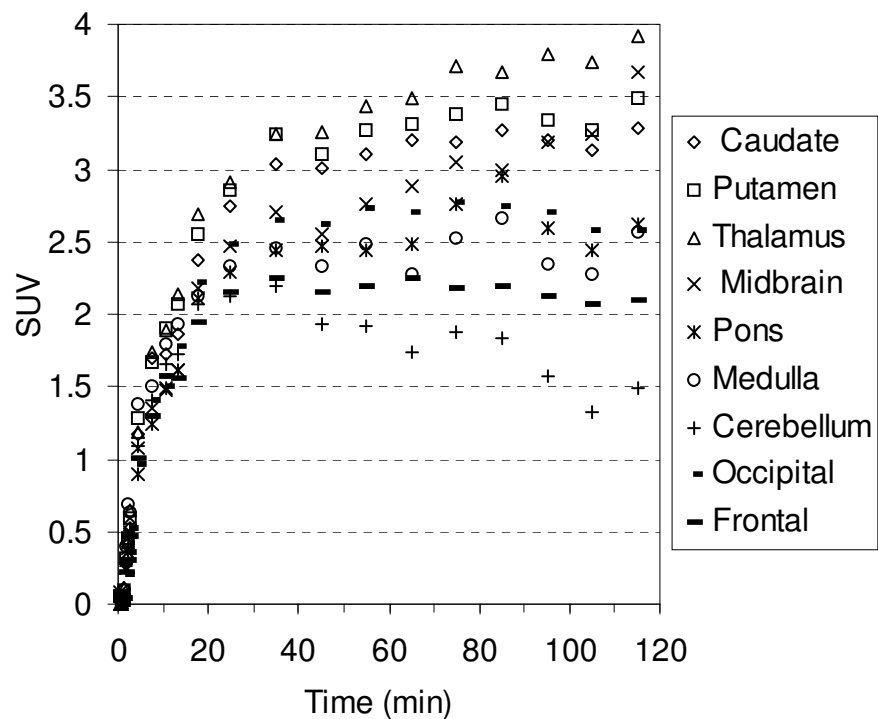

**Figure S17.** HRRT baseline TACs obtained by injection of [ $^{18}\text{F}$ ]19 into an awake rhesus monkey (reproduced from Plisson, *et al.*, *J. Med. Chem.* **2007**, *50*, 4553-4560, Figure 8).

**Table S13.** Uptake values vs. time used to generate the TACs in Figure S17 for the awake rhesus HRRT baseline study performed with [<sup>18</sup>F]19.

| Time (min) | Caudate | Putamen | Thalamus | Midbrain | Pons | Medulla | Cerebellum | Frontal | Occipital |
|------------|---------|---------|----------|----------|------|---------|------------|---------|-----------|
| 0.3        | 0.03    | 0.05    | 0.00     | 0.08     | 0.00 | 0.06    | 0.01       | 0.07    | 0.00      |
| 0.8        | 0.00    | 0.03    | 0.00     | 0.01     | 0.02 | 0.00    | 0.00       | 0.00    | 0.01      |
| 1.3        | 0.11    | 0.09    | 0.12     | 0.05     | 0.03 | 0.09    | 0.06       | 0.05    | 0.04      |
| 1.8        | 0.28    | 0.31    | 0.32     | 0.25     | 0.25 | 0.41    | 0.27       | 0.22    | 0.20      |
| 2.3        | 0.41    | 0.46    | 0.46     | 0.39     | 0.36 | 0.68    | 0.39       | 0.30    | 0.36      |
| 2.8        | 0.53    | 0.60    | 0.65     | 0.59     | 0.50 | 0.63    | 0.51       | 0.47    | 0.53      |
| 4.5        | 1.17    | 1.28    | 1.18     | 1.08     | 0.89 | 1.39    | 1.08       | 1.01    | 0.96      |
| 7.5        | 1.69    | 1.67    | 1.74     | 1.35     | 1.24 | 1.51    | 1.40       | 1.29    | 1.41      |
| 10.5       | 1.73    | 1.90    | 1.89     | 1.47     | 1.49 | 1.79    | 1.66       | 1.57    | 1.50      |
| 13.5       | 1.87    | 2.06    | 2.13     | 1.61     | 1.61 | 1.93    | 1.72       | 1.57    | 1.77      |
| 17.5       | 2.38    | 2.56    | 2.70     | 2.18     | 2.12 | 2.12    | 2.07       | 1.94    | 2.22      |
| 25         | 2.75    | 2.85    | 2.90     | 2.46     | 2.29 | 2.33    | 2.12       | 2.16    | 2.48      |
| 35         | 3.03    | 3.24    | 3.24     | 2.70     | 2.44 | 2.46    | 2.20       | 2.24    | 2.65      |
| 45         | 3.00    | 3.10    | 3.26     | 2.55     | 2.47 | 2.33    | 1.93       | 2.15    | 2.61      |
| 55         | 3.11    | 3.27    | 3.44     | 2.76     | 2.44 | 2.48    | 1.92       | 2.20    | 2.73      |
| 65         | 3.20    | 3.31    | 3.48     | 2.88     | 2.49 | 2.28    | 1.74       | 2.25    | 2.71      |
| 75         | 3.19    | 3.38    | 3.72     | 3.05     | 2.75 | 2.52    | 1.88       | 2.18    | 2.78      |
| 85         | 3.27    | 3.45    | 3.67     | 2.99     | 2.95 | 2.66    | 1.83       | 2.20    | 2.74      |
| 95         | 3.19    | 3.34    | 3.79     | 3.19     | 2.59 | 2.35    | 1.58       | 2.12    | 2.70      |
| 105        | 3.13    | 3.26    | 3.74     | 3.24     | 2.44 | 2.27    | 1.33       | 2.07    | 2.58      |
| 115        | 3.28    | 3.49    | 3.92     | 3.68     | 2.63 | 2.57    | 1.49       | 2.10    | 2.57      |

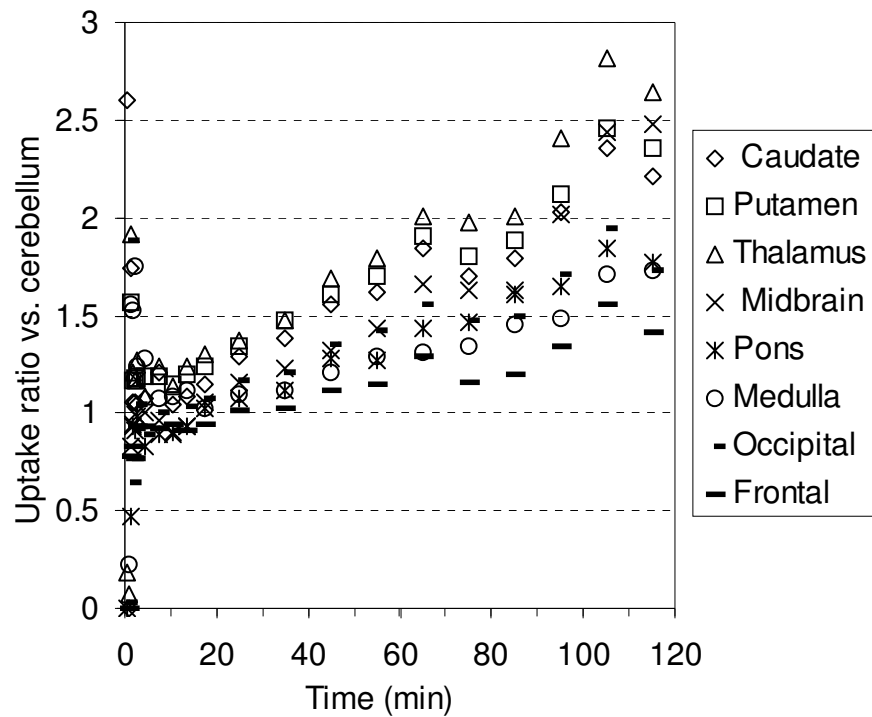

**Figure S18.** Graph of the change in uptake ratio with time for the HRRT awake rhesus monkey baseline study performed with [<sup>18</sup>F]19 (Figure S17).

**Table S14.** Ratio of uptake in specific brain regions vs. cerebellum uptake for the awake rhesus HRRT baseline study performed with [ $^{18}\text{F}$ ]**19** (Figure S17).

| Time (min) | Caudate | Putamen | Thalamus | Midbrain | Pons | Medulla | Frontal | Occipital |
|------------|---------|---------|----------|----------|------|---------|---------|-----------|
| 0.3        | 2.6     | 5.1     | 0.2      | 7.8      | 0.0  | 5.8     | 6.5     | 0.0       |
| 0.8        | 0.0     | 7.2     | 0.1      | 3.1      | 4.8  | 0.2     | 0.0     | 1.9       |
| 1.3        | 1.7     | 1.6     | 1.9      | 0.8      | 0.5  | 1.6     | 0.8     | 0.6       |
| 1.8        | 1.1     | 1.2     | 1.2      | 0.9      | 0.9  | 1.5     | 0.8     | 0.8       |
| 2.3        | 1.1     | 1.2     | 1.2      | 1.0      | 0.9  | 1.7     | 0.8     | 0.9       |
| 2.8        | 1.0     | 1.2     | 1.3      | 1.2      | 1.0  | 1.2     | 0.9     | 1.0       |
| 4.5        | 1.1     | 1.2     | 1.1      | 1.0      | 0.8  | 1.3     | 0.9     | 0.9       |
| 7.5        | 1.2     | 1.2     | 1.2      | 1.0      | 0.9  | 1.1     | 0.9     | 1.0       |
| 10.5       | 1.0     | 1.1     | 1.1      | 0.9      | 0.9  | 1.1     | 0.9     | 0.9       |
| 13.5       | 1.1     | 1.2     | 1.2      | 0.9      | 0.9  | 1.1     | 0.9     | 1.0       |
| 17.5       | 1.1     | 1.2     | 1.3      | 1.1      | 1.0  | 1.0     | 0.9     | 1.1       |
| 25         | 1.3     | 1.3     | 1.4      | 1.2      | 1.1  | 1.1     | 1.0     | 1.2       |
| 35         | 1.4     | 1.5     | 1.5      | 1.2      | 1.1  | 1.1     | 1.0     | 1.2       |
| 45         | 1.6     | 1.6     | 1.7      | 1.3      | 1.3  | 1.2     | 1.1     | 1.4       |
| 55         | 1.6     | 1.7     | 1.8      | 1.4      | 1.3  | 1.3     | 1.1     | 1.4       |
| 65         | 1.8     | 1.9     | 2.0      | 1.7      | 1.4  | 1.3     | 1.3     | 1.6       |
| 75         | 1.7     | 1.8     | 2.0      | 1.6      | 1.5  | 1.3     | 1.2     | 1.5       |
| 85         | 1.8     | 1.9     | 2.0      | 1.6      | 1.6  | 1.5     | 1.2     | 1.5       |
| 95         | 2.0     | 2.1     | 2.4      | 2.0      | 1.6  | 1.5     | 1.3     | 1.7       |
| 105        | 2.4     | 2.5     | 2.8      | 2.4      | 1.8  | 1.7     | 1.6     | 1.9       |
| 115        | 2.2     | 2.4     | 2.6      | 2.5      | 1.8  | 1.7     | 1.4     | 1.7       |



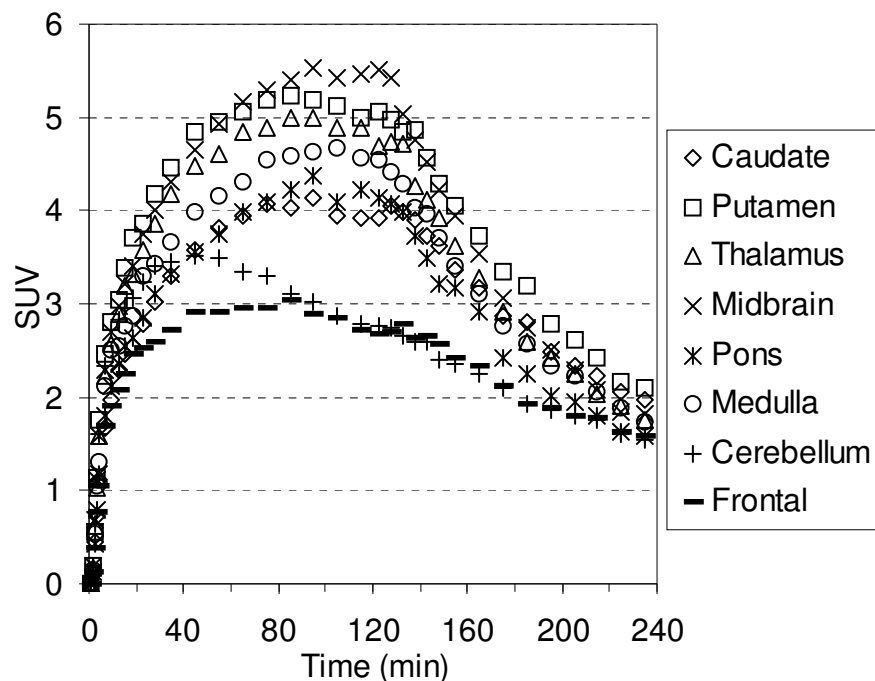

**Figure S19.** MicroPET TACs showing the results of injection of **15** (1.5 mg/kg) into an anesthetized cynomolgus monkey at 120 min post-injection of [ $^{18}\text{F}$ ]**19** (reproduced from Plisson, *et al.*, *J. Med. Chem.* **2007**, *50*, 4553-4560, Figure 4).

**Table S15.** Percentage of protein-bound [ $^{18}\text{F}$ ]**1** in plasma (after removal of red blood cells by centrifugation) as determined by acetonitrile precipitation of the plasma.

| Time (min) p.i. | % [ $^{18}\text{F}$ ] <b>1</b> bound to plasma proteins |
|-----------------|---------------------------------------------------------|
| 1               | 5.8                                                     |
| 2               | 5.6                                                     |
| 5               | 7.5                                                     |
| 15              | 6.8                                                     |
| 30              | 8.4                                                     |
| 60              | 8.5                                                     |
| 120             | 6.6                                                     |
| 180             | 8.5                                                     |

**Table S16.** Elemental analysis results and HPLC purity for compounds **1-4**.

| compd    | Theory |      |      | Found <sup>a</sup> |      |      | HPLC (254 nm)          |                        |
|----------|--------|------|------|--------------------|------|------|------------------------|------------------------|
|          | C      | H    | N    | C                  | H    | N    | Solvent-1 <sup>b</sup> | Solvent-2 <sup>c</sup> |
| <b>1</b> | 50.36  | 4.93 | 3.26 | 50.26              | 5.12 | 3.12 | 95 %                   | 98 %                   |
| <b>2</b> | 56.56  | 5.54 | 3.66 | 53.81              | 5.68 | 3.43 | 90 %                   | 95 %                   |
| <b>3</b> | 51.48  | 5.23 | 3.16 | 50.96              | 5.39 | 3.01 | 95 %                   | 98 %                   |
| <b>4</b> | 57.58  | 5.85 | 3.53 | 54.74              | 5.89 | 3.33 | 98 %                   | 98 %                   |

a) Analysis performed by Atlantic Microlab, Inc.

b) HPLC System 1: Waters Nova-Pak C<sub>18</sub> 3.9 x 150 mm, 75:25:0.1 v/v/v MeOH/H<sub>2</sub>O/NEt<sub>3</sub>, 1 mL/min.

c) HPLC System 2: Waters XTerra Prep RP<sub>18</sub> 5 $\mu\text{m}$ , 19 x 100 mm + 19 x 10 mm Guard, 60:40:0.1 v/v/v MeOH/H<sub>2</sub>O/NEt<sub>3</sub>, 9.0 mL/min.
